# Supplementary material
Source: PubMed Central journal article supplement (PMC3620960)

# Figure S1a

LOCUS : 5q23.1, Chromosome: 5; NC\_000005.9 (118604418..118730294) (Genomic TNFAIP8, 125,877 bp)  
 mRNA ACCESSION No: NM\_001077654.1 (Transcript Variant 2); NM\_014350.2 (Transcript Variant 1)  
 Protein Accession No: NP\_001071122.1 (Protein Isoform b); NP\_055165.2 (Protein Isoform a)  
[http://www.ncbi.nlm.nih.gov/sites/entrez?db=gene&cmd=Retrieve&dopt=full\\_report&list\\_uids=25816#](http://www.ncbi.nlm.nih.gov/sites/entrez?db=gene&cmd=Retrieve&dopt=full_report&list_uids=25816#)

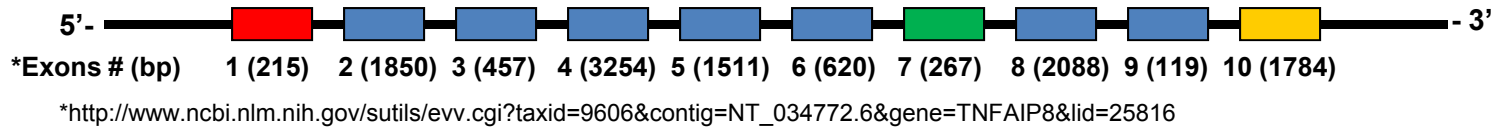

**Transcript Variant 2 (2012 bp, includes 5'UTR 214 bp and 3'UTR 1233 bp)**

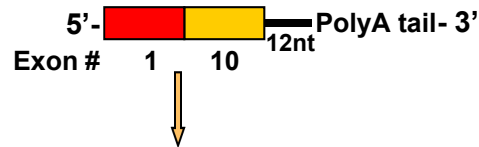

**Protein Isoform b (188aa, 21.8 kDa)**

\*\*\*SCC-S2, GG2-1, NDED, MDC-3.13 (Uniprot: O95379-3)

\*\*\* Kumar *et al.*, J. Biol. Chem. 275:2973-2978, 2000

MATDVFNSKNLAVQAQKKILGKMOVSKSIATTLIDDTSSSEVLDELRYVTREYTNQNK  
 KEAEKIIKNLIKTVIKLAILYRNNQFNQDELALMEKFKKKVHQLAMTVVFSHQVD  
 YTFDRNVLSRLLNECREMLHQIQRHLTAK SHGRVNNVDFHSDCEFLAALYN  
 PFGNFKPHLQKLCDGINKMLDEENI

**Transcript Variant 1 (2017 bp, includes 5'UTR 190 bp and 3'UTR 1233bp)**

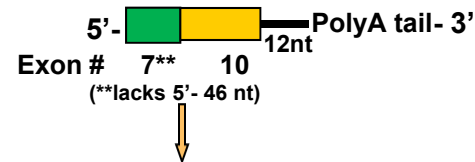

**Protein Isoform a (198aa, 23 kDa)**

**MDC-3.13-2 (Uniprot: O95379-1)**

MHSEAEESKEVATDVFNSKNLAVQAQKKILGKMOVSKSIATTLIDDTSSSE  
 VLDELRYVTREYTNQNKKEAEKIIKNLIKTVIKLAILYRNNQFNQDELALM  
 EKFKKKVHQLAMTVVFSHQVDYTFDRNVLSRLLNECREMLHQIQRHL  
 TAKSHGRVNNVDFHSDCEFLAALYNPFGNFKPHLQKLCDGINKMLD  
 EENI

Figure S1b

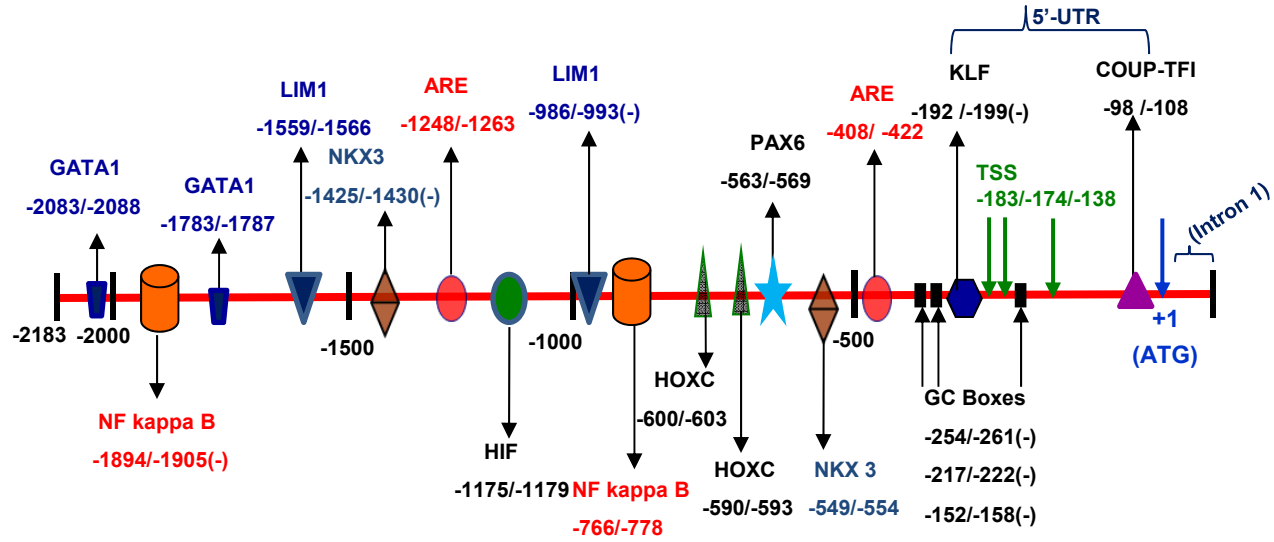

# Figure S2a

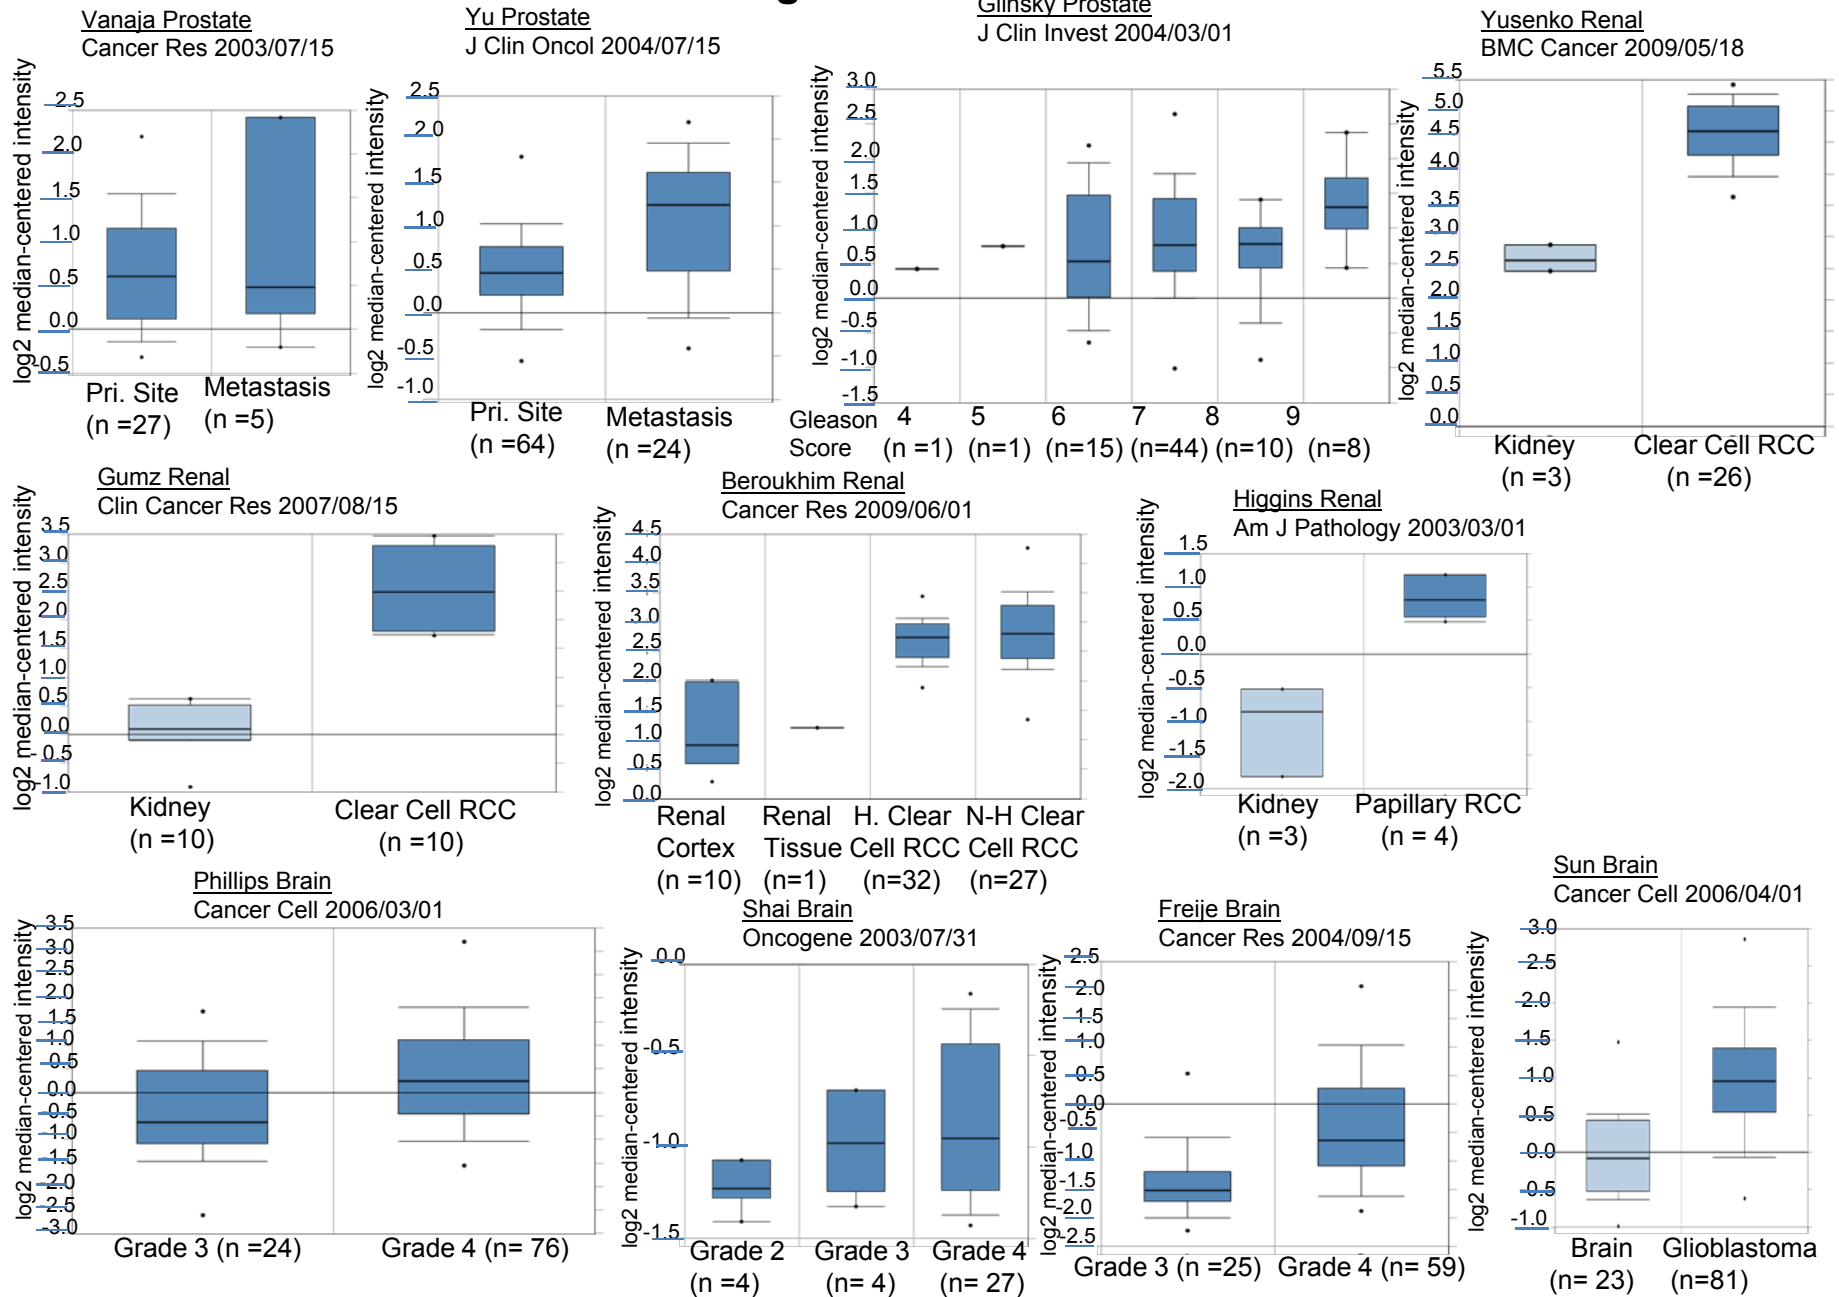

# Figure S2a (contd.)

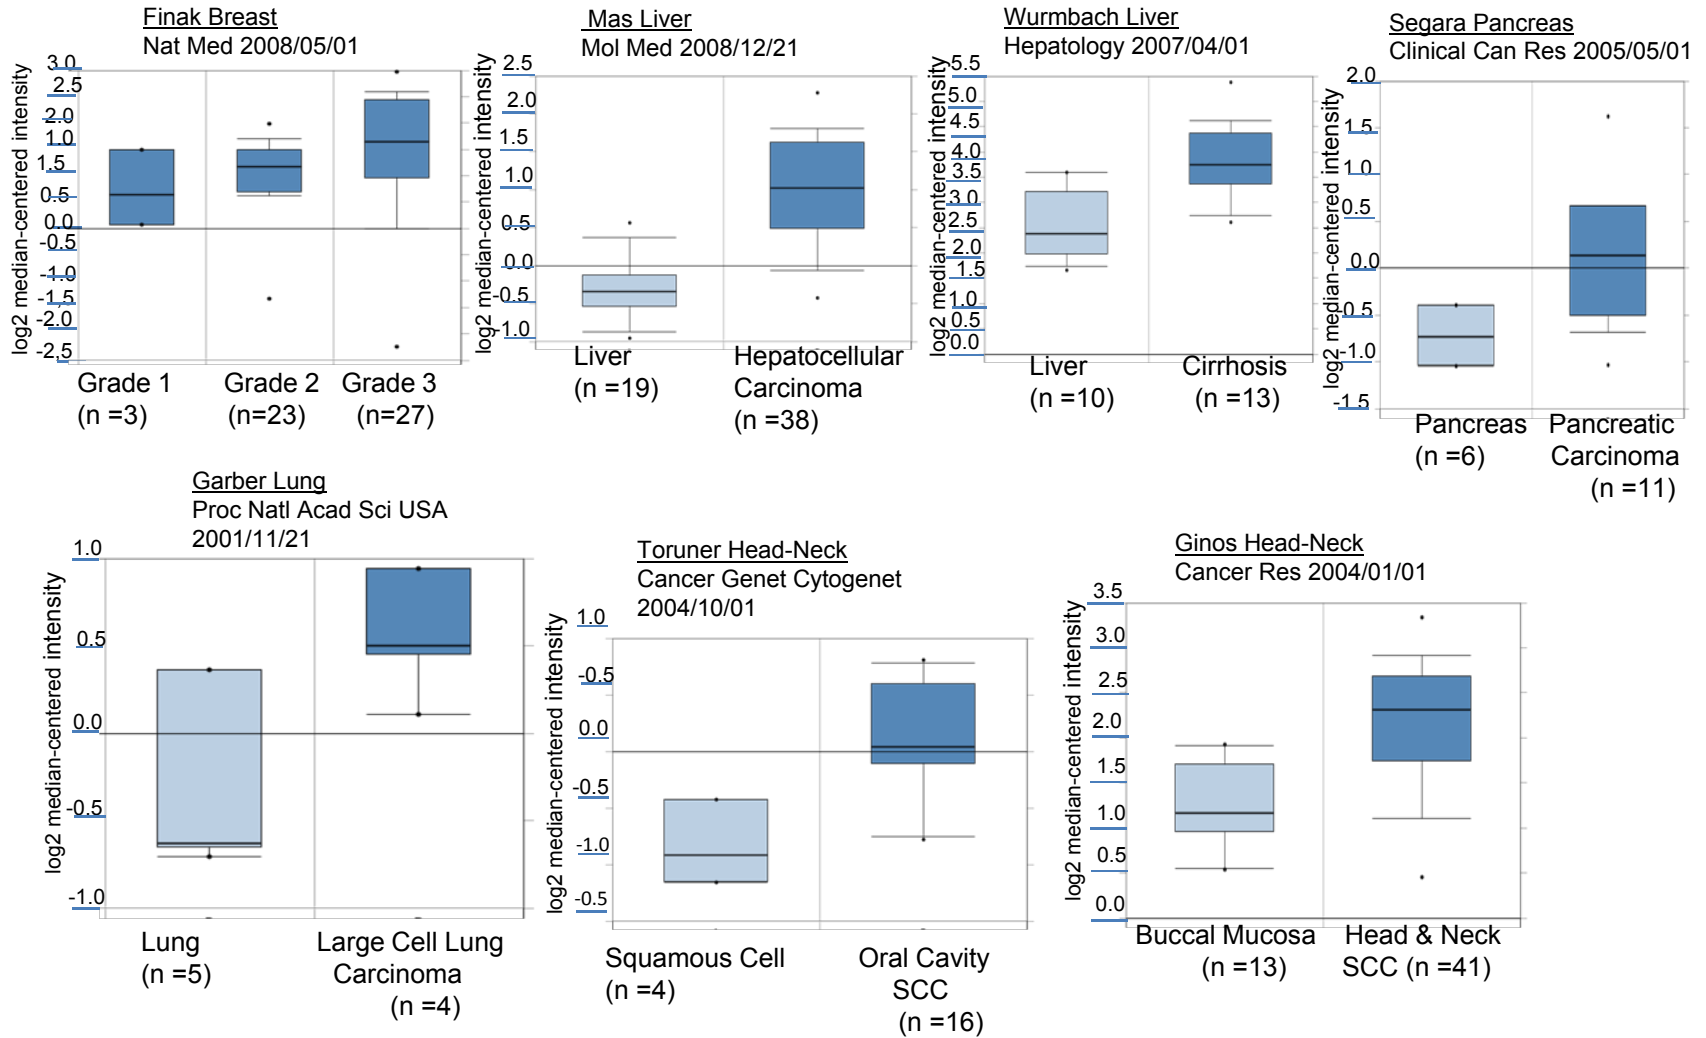

## Figure S2b

GDS2865/208296\_x\_at  
(Wong et al., Proc Natl Acad Sci USA 2007,104:12784)

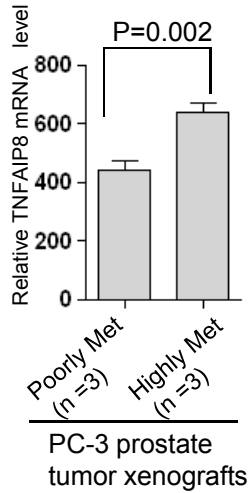

GDS1965/210260\_s\_at  
(Hoek et al., Cancer Res 2004,64:5270)

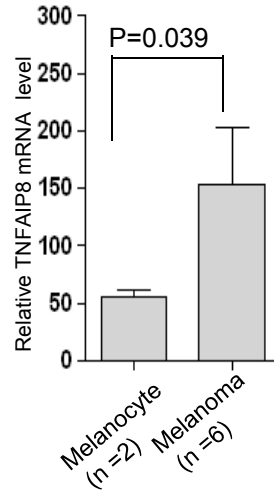

GDS2739/g7657123\_3p\_a\_at  
(Lee et al., Am J Pathol 2007,171:252)

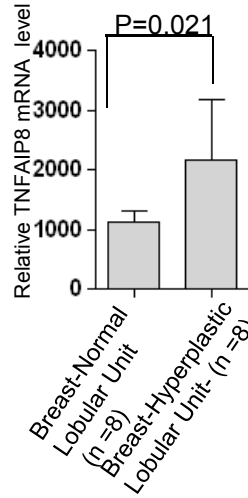

GDS1780/208296\_x\_at  
(Provenzani et al., Carcinogenesis 2006,27:1323)

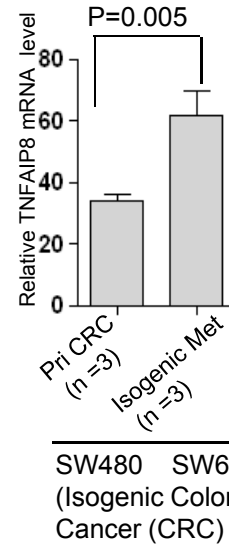

GDS2609/210260\_s\_at  
(Hong et al., Clin Cancer Res 2007,13:1107)

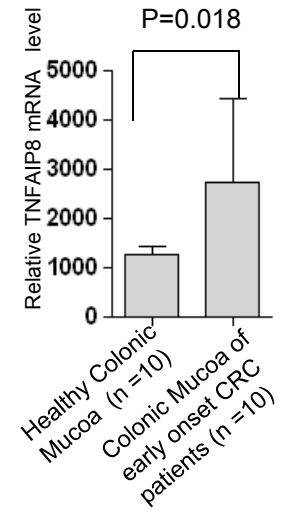

GDS505/210260\_x\_at  
(Lenburg et al., BMC Cancer 2003,3:31)

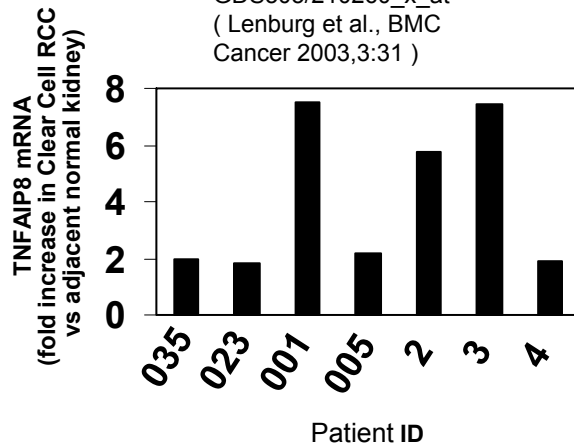

# Figures S3a- S3c

a (Expt.1)

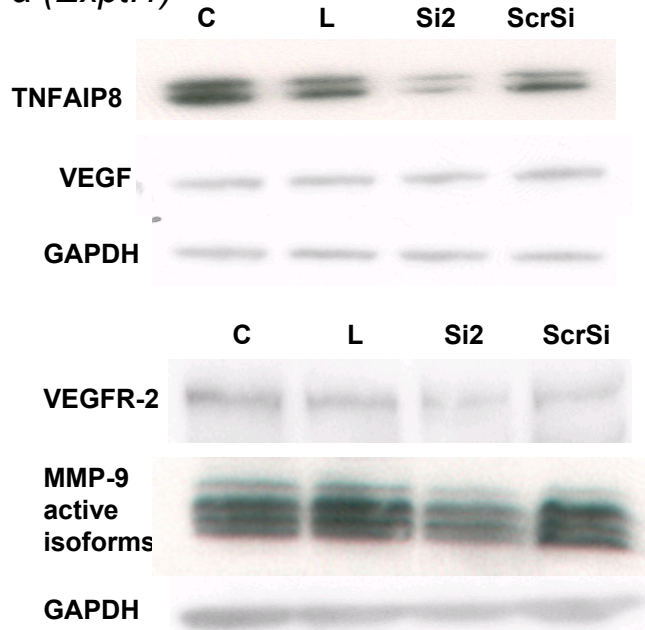

b (Expt.2)

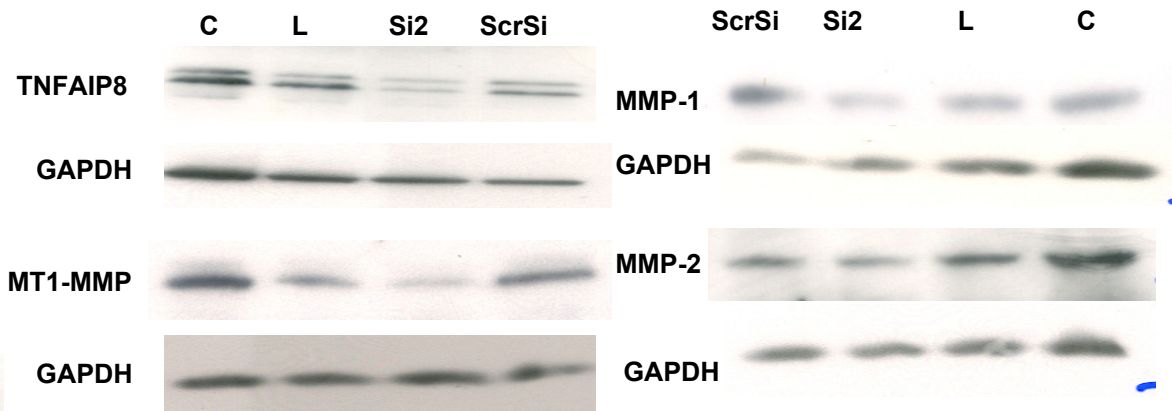

c

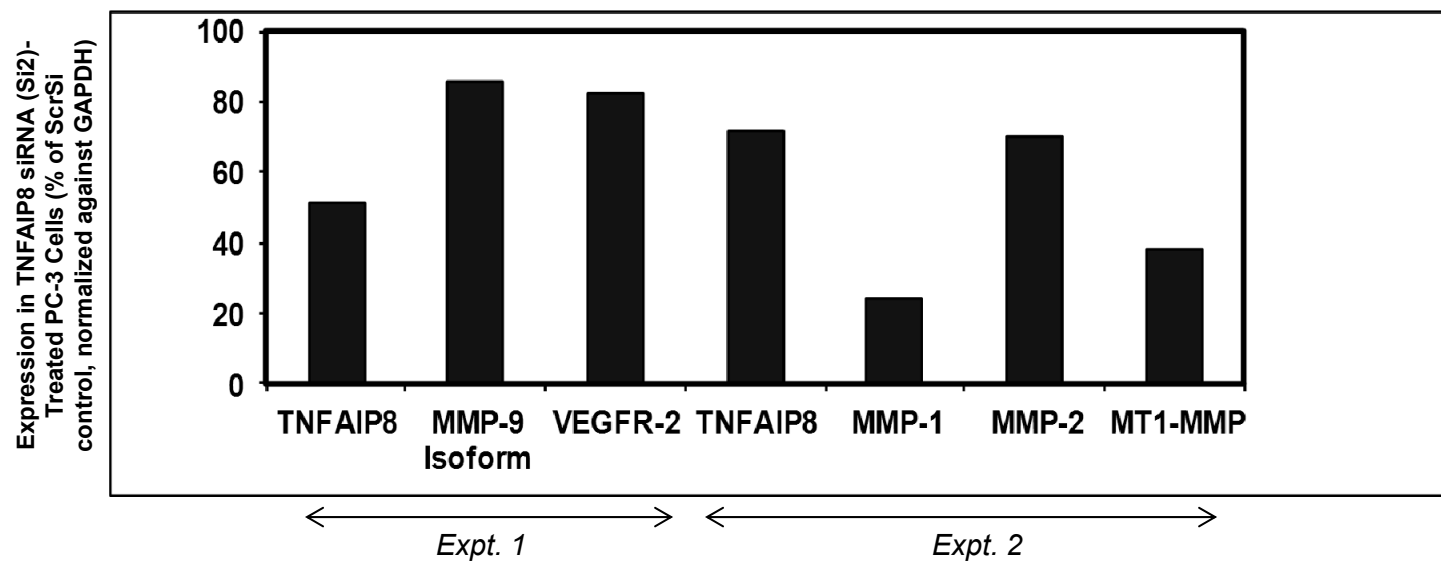

# Figure S4a-S4c

## a. *In vitro*

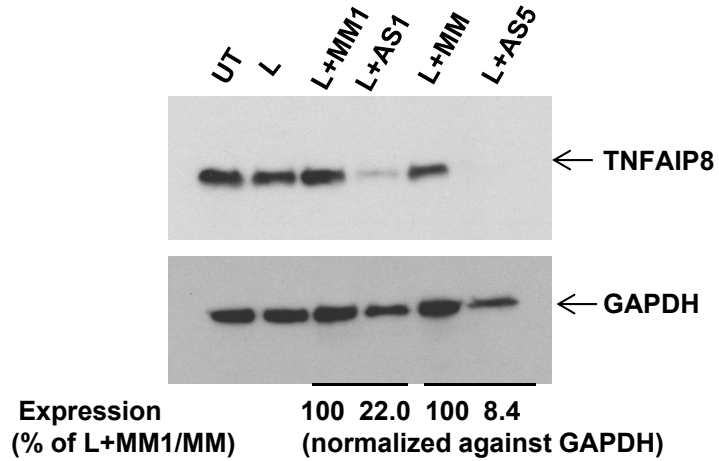

## c.

TNFAIP8 antisense oligonucleotides tested *in vitro/in vivo* (14-mers; AS1 and AS5 are identical sequences)

**All bases phosphorothioated**

AS1    5'-GsTsGsGsCsCsAsTsCsGsGsAsGsG-3'

AS2    5'-GsCsCsCsTsAsTsTsAsAsAsAsG-3'

**Only one base at each end phosphorothioated**

AS5    5'-GsTGGCCATCGGAGsG-3'

## b. *In vivo*

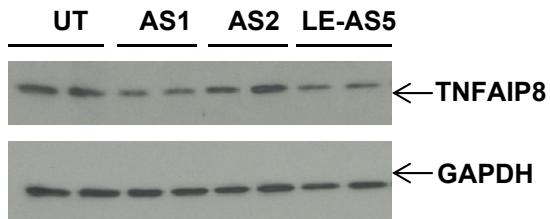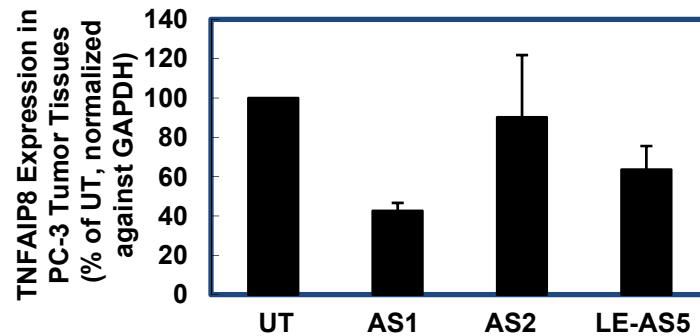

**Figure S5a**

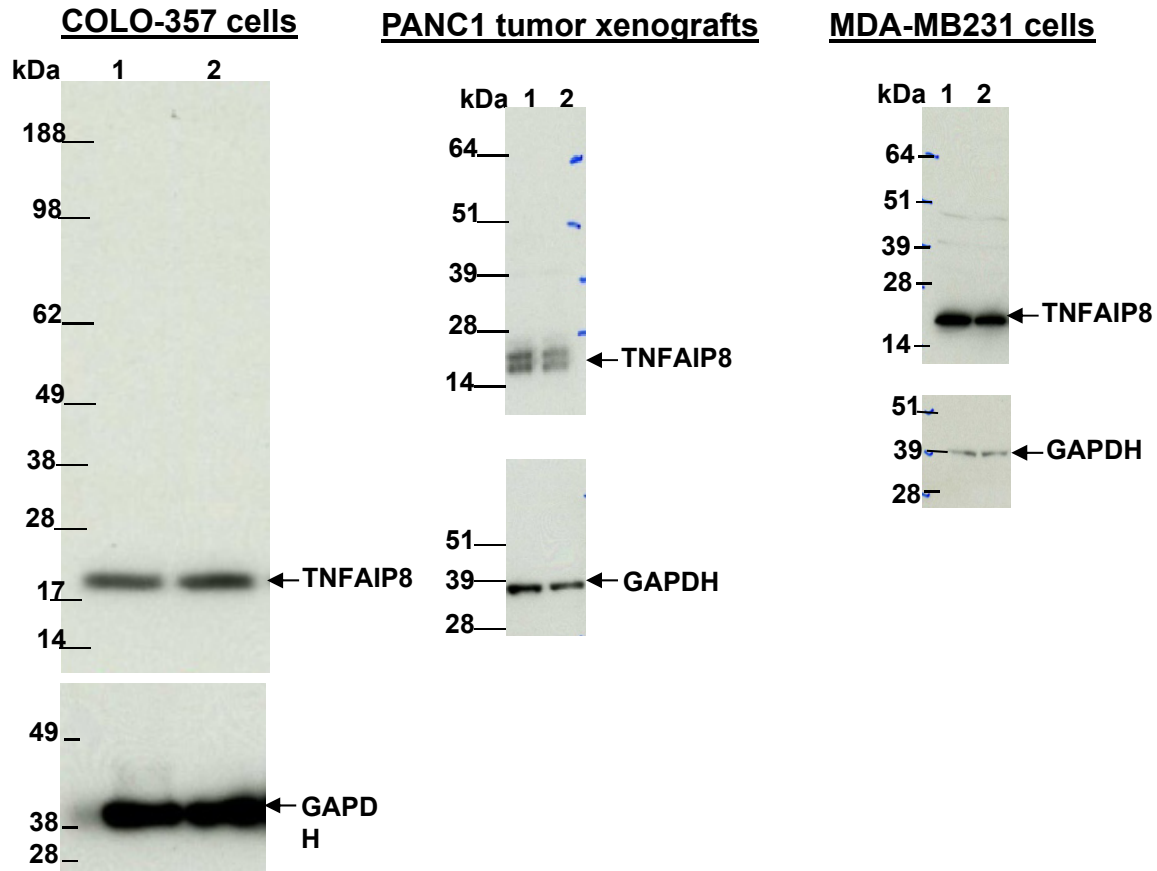



**Figure S5b**

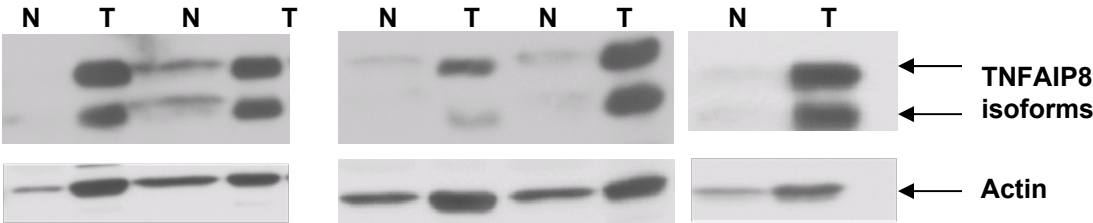

**Figure S5c**

**Immunoprecipitation (IP):**

- Lane 1. anti-TNFAIP8
- Lane 2. anti-Raf-1 (polyclonal)
- Lane 3. Normal rabbit IgG

**Immunoblotting (IB):**

anti-TNFAIP8

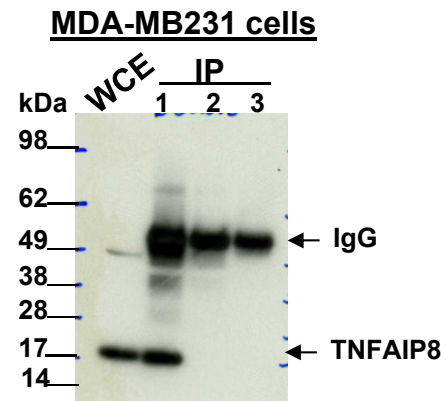

**Figure S6a**

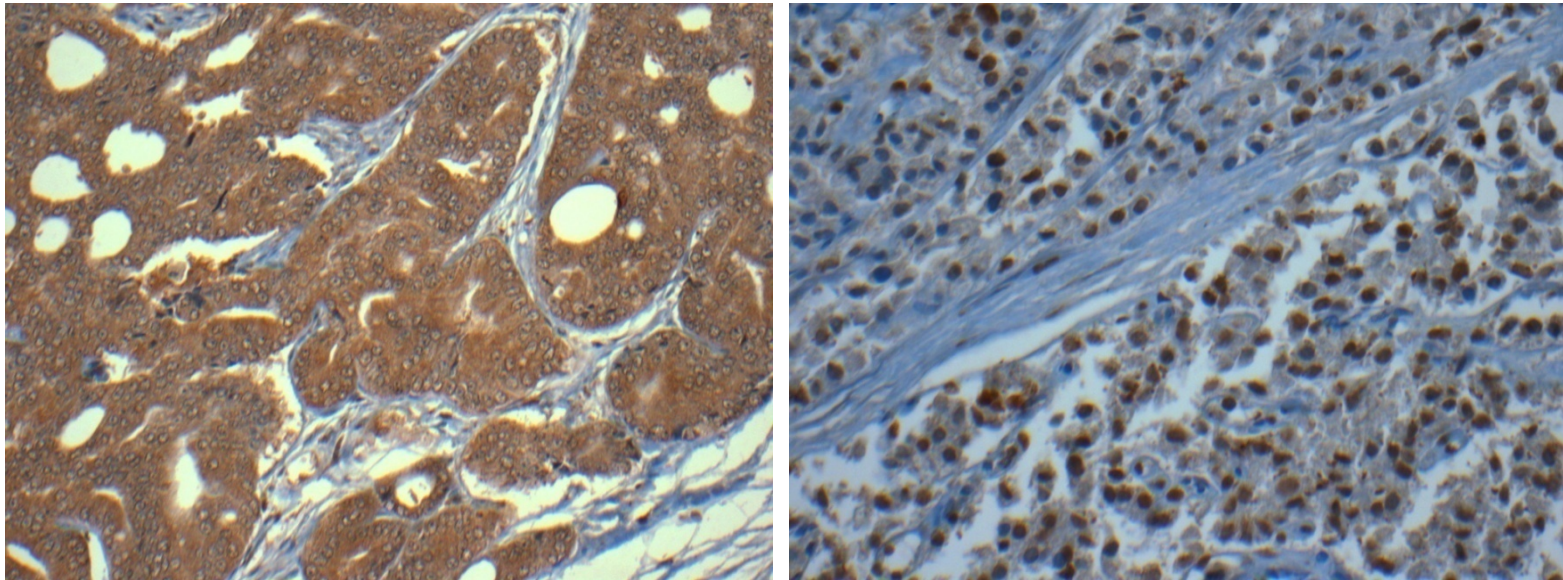

**Immunohistochemical analysis of TNFAIP8 in prostate tumor TMA**

| <b>PAC Grade</b>              | <b>Cytoplasmic TNFAIP8</b> |                            | <b>Nuclear TNFAIP8</b> |                            |
|-------------------------------|----------------------------|----------------------------|------------------------|----------------------------|
|                               | <b>Weak</b>                | <b>Moderate to Intense</b> | <b>Weak</b>            | <b>Moderate to Intense</b> |
| Low (n =26)                   | 15/26 (58%)                | 11/26 (42%)                | 0/26                   | 1/26 (4%)                  |
| Intermediate/<br>High (n =38) | 4/38 (11%)                 | 34/38 (89%)                | 0/38                   | 5/38 (13%)                 |

**Figure S6b**

| Patient ID | Grade 0=LG<br>1=HG | Cytoplasmic<br>TNFAIP8<br>(Tumor vs<br>Adjacent<br>Benign)* |
|------------|--------------------|-------------------------------------------------------------|
| 1          | 1                  | 1                                                           |
| 2          | 0                  | -1                                                          |
| 3          | 1                  | 1                                                           |
| 6          | 1                  | 1                                                           |
| 11         | 0                  | -1                                                          |
| 13         | 0                  | -1                                                          |
| 20         | 1                  | 1                                                           |
| 25         | 1                  | 1                                                           |
| 35         | 0                  | -1                                                          |
| 37         | 0                  | -1                                                          |
| 39         | 1                  | 1                                                           |
| 41         | 0                  | -1                                                          |
| 45         | 0                  | 1                                                           |
| 46         | 1                  | -1                                                          |
| 50         | 0                  | -1                                                          |
| 51         | 0                  | -1                                                          |
| 52         | 0                  | -1                                                          |
| 53         | 1                  | -1                                                          |
|            | 18                 | 18                                                          |

| Patient ID | Grade 0=LG<br>1=HG | Nuclear<br>TNFAIP8<br>(Tumor vs<br>Adjacent<br>Benign)* |
|------------|--------------------|---------------------------------------------------------|
| 3          | 1                  | 1                                                       |
| 4          | 0                  | 1                                                       |
| 5          | 1                  | 1                                                       |
| 6          | 1                  | 1                                                       |
| 14         | 1                  | 1                                                       |
| 17         | 1                  | 1                                                       |
| 18         | 1                  | 1                                                       |
| 20         | 1                  | 1                                                       |
| 21         | 1                  | 1                                                       |
| 22         | 1                  | 1                                                       |
| 23         | 1                  | 1                                                       |
| 24         | 1                  | 1                                                       |
| 25         | 1                  | 1                                                       |
| 31         | 1                  | 1                                                       |
| 37         | 0                  | 1                                                       |
| 45         | 0                  | 1                                                       |
|            | 16                 | 16                                                      |

**Figure S6c**

| <b>Patient ID</b> | <b>0=Non-Recurrent<br/>1= Recurrent</b> | <b>Nuclear<br/>TNFAIP8<br/>(Tumor vs<br/>Adjacent<br/>Benign)*</b> |
|-------------------|-----------------------------------------|--------------------------------------------------------------------|
| 3                 | 1                                       | 1                                                                  |
| 4                 | 0                                       | 1                                                                  |
| 5                 | 1                                       | 1                                                                  |
| 6                 | 1                                       | 1                                                                  |
| 7                 | 0                                       | 0                                                                  |
| 8                 | 1                                       | 0                                                                  |
| 9                 | 1                                       | 0                                                                  |
| 10                | 1                                       | 0                                                                  |
| 12                | 1                                       | 0                                                                  |
| 14                | 1                                       | 1                                                                  |
| 15                | 1                                       | 0                                                                  |
| 16                | 0                                       | 0                                                                  |
| 17                | 1                                       | 1                                                                  |
| 18                | 1                                       | 1                                                                  |
| 19                | 0                                       | 0                                                                  |
| 20                | 0                                       | 1                                                                  |
| 21                | 1                                       | 1                                                                  |
| 22                | 1                                       | 1                                                                  |
| 23                | 1                                       | 1                                                                  |
| 24                | 0                                       | 1                                                                  |
| 25                | 1                                       | 1                                                                  |
| 26                | 0                                       | 0                                                                  |
| 27                | 0                                       | 0                                                                  |
| 28                | 0                                       | 0                                                                  |
| 29                | 1                                       | 0                                                                  |
| 30                | 1                                       | 0                                                                  |
| 31                | 1                                       | 1                                                                  |
| 32                | 0                                       | 0                                                                  |
| 33                | 0                                       | 0                                                                  |
| 34                | 0                                       | 0                                                                  |
| 36                | 1                                       | 0                                                                  |
| 37                | 0                                       | 1                                                                  |
| 38                | 1                                       | 0                                                                  |
| 40                | 0                                       | 0                                                                  |
| 42                | 0                                       | 0                                                                  |
| 43                | 1                                       | 0                                                                  |
| 44                | 0                                       | 0                                                                  |
| 45                | 0                                       | 1                                                                  |
| 47                | 0                                       | 0                                                                  |
| 48                | 0                                       | 0                                                                  |
| 49                | 0                                       | 0                                                                  |
| 54                | 0                                       | 0                                                                  |
|                   | 42                                      | 42                                                                 |

**Figure S7**

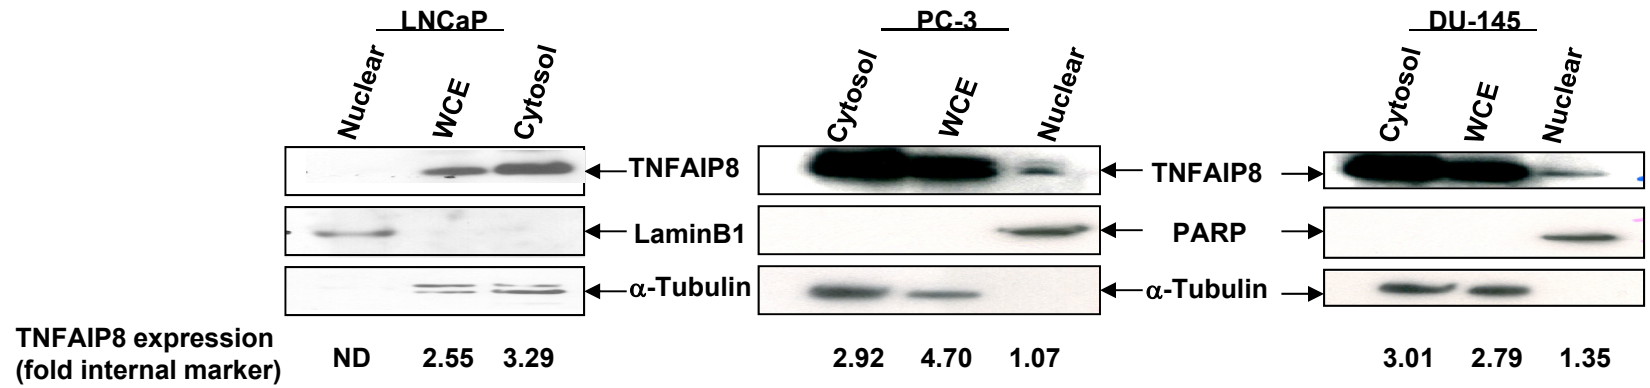

# Figure S8

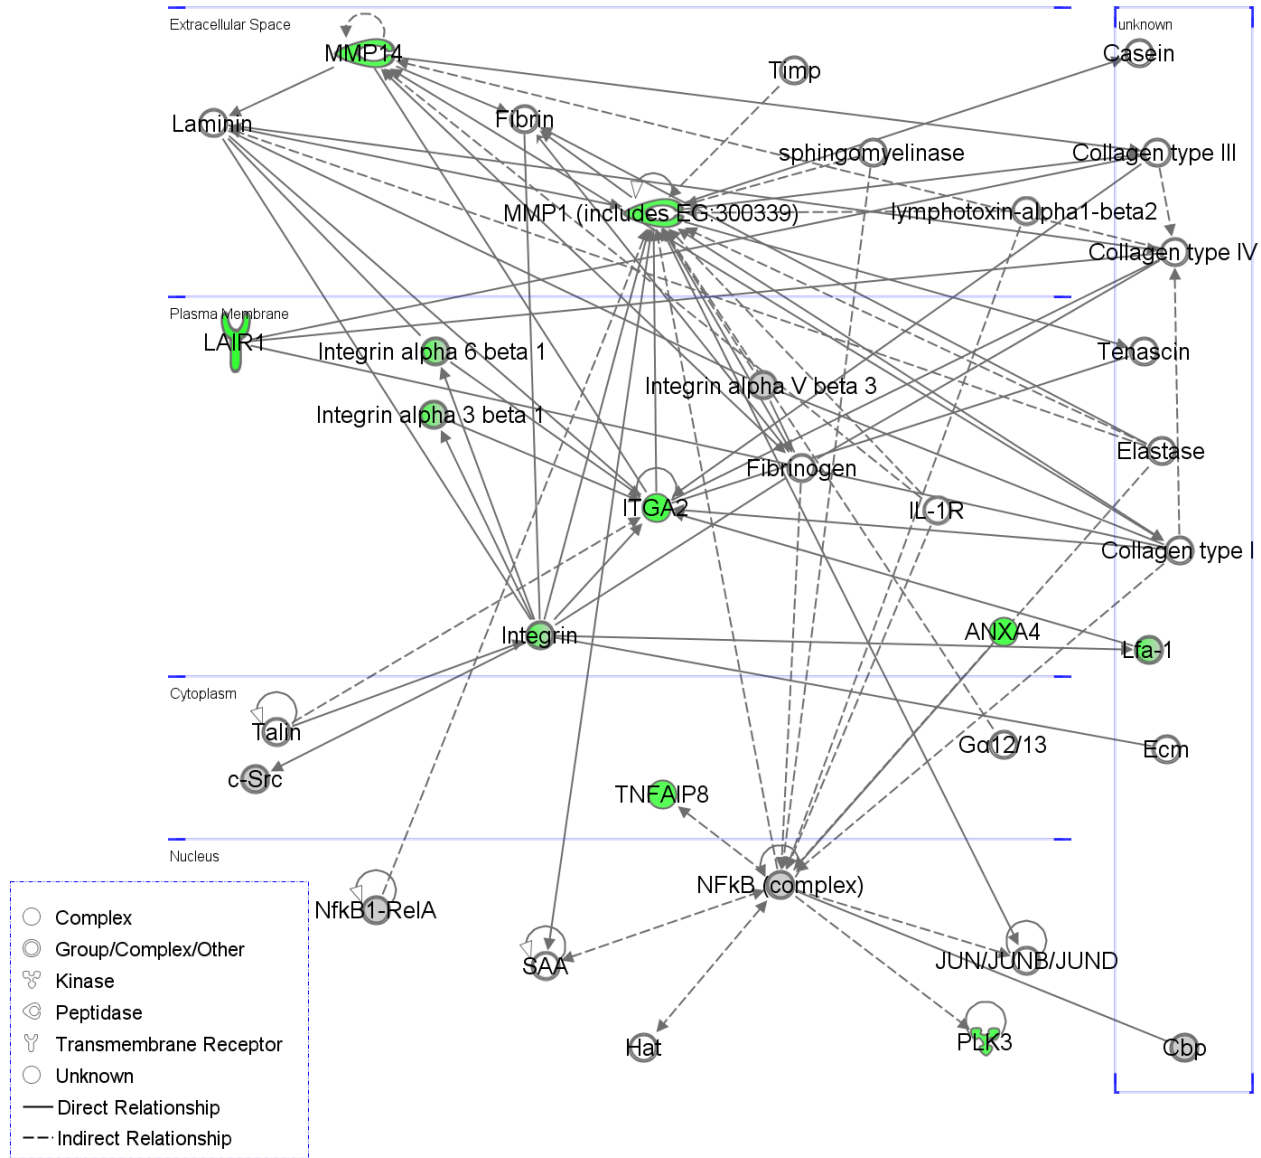

Figure S9

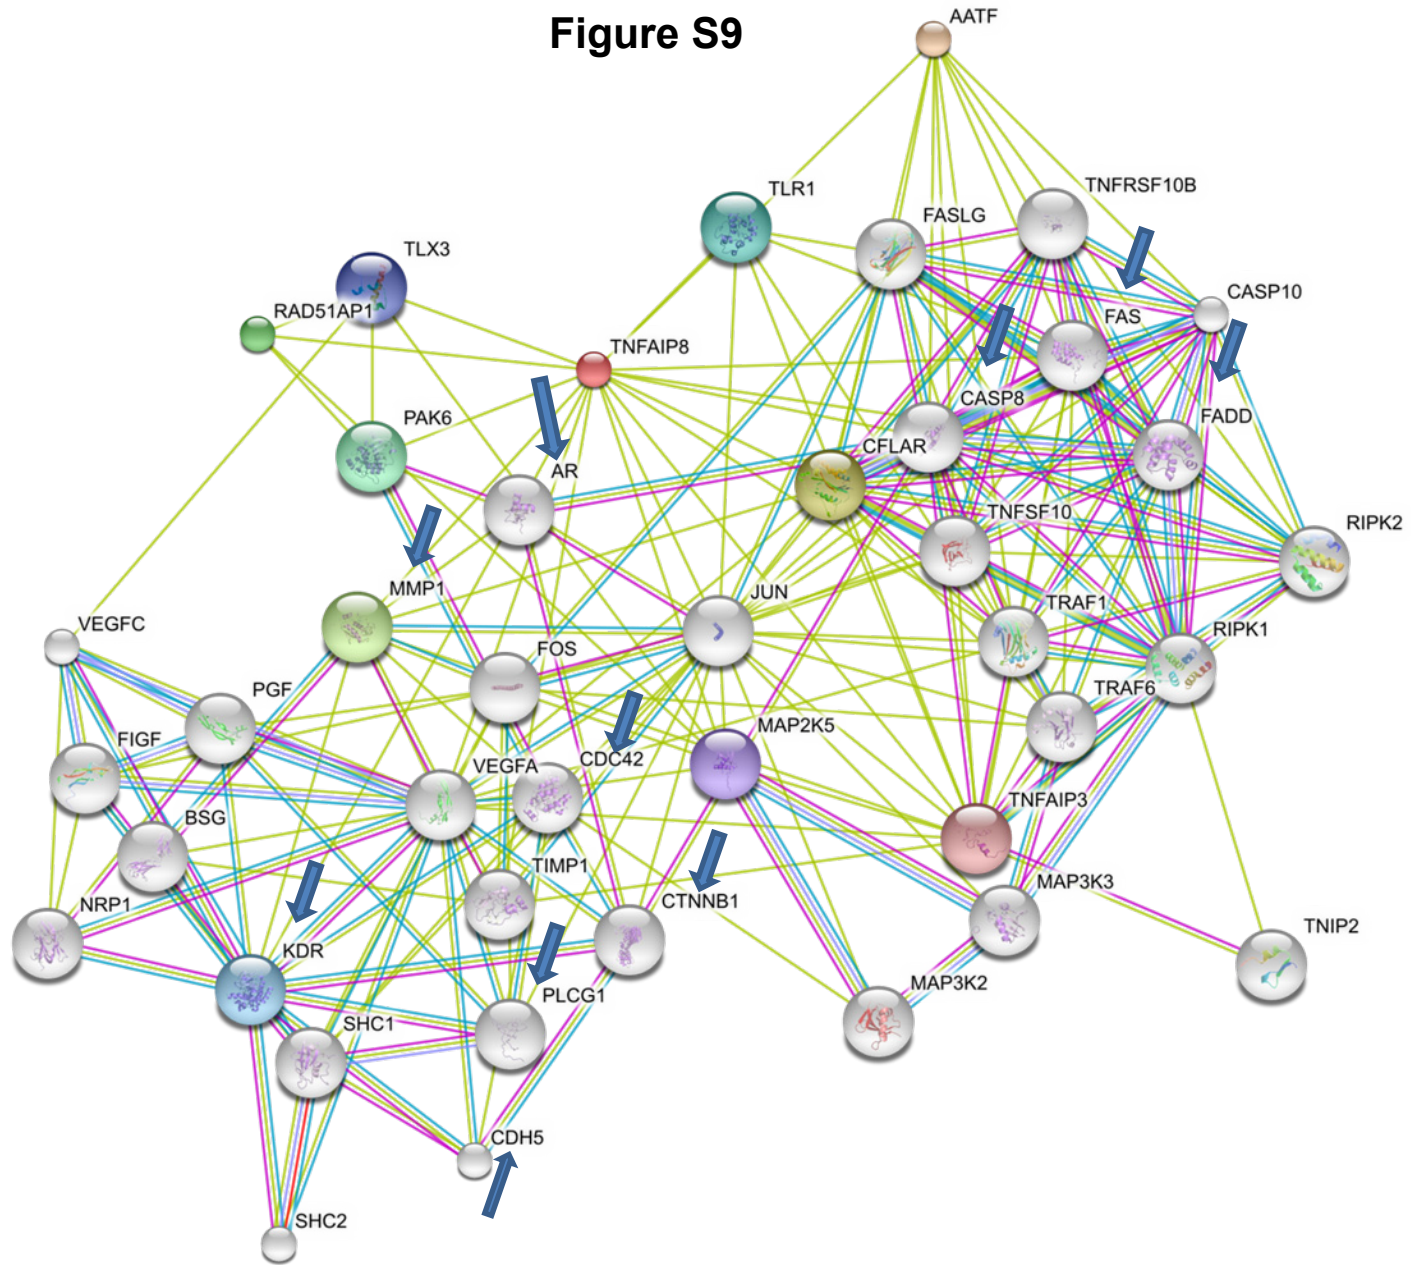

Supplement: NIHMS430162-supplement-Supp_Fig_S1-S9.pdf [file NIHMS430162-supplement-Supp_Fig_S1-S9.pdf]
