# Supplementary material
Source: PubMed Central journal article supplement (PMC3620960)
Supplement: NIHMS430162-supplement-Supp_Table_S1.pdf [file NIHMS430162-supplement-Supp_Table_S1.pdf]

**Table S1. List of TNFAIP8 interacting proteins identified by antibody microarray analysis**

| ID            | Symbol       | Fold Change <sup>1</sup> | P-value <sup>2</sup> | Entrez Gene Name                                                                                                 | Location               | Type(s)                       |
|---------------|--------------|--------------------------|----------------------|------------------------------------------------------------------------------------------------------------------|------------------------|-------------------------------|
| P01375        | TNF          | 2.1                      | 8.83E-03             | tumor necrosis factor                                                                                            | Extracellular Space    | cytokine                      |
| O14893        | SIP1         | 2                        | 2.64E-03             | survival of motor neuron protein interacting protein 1                                                           | Nucleus                | other                         |
| <b>P56159</b> | <b>GFRA1</b> | <b>2</b>                 | <b>4.00E-05</b>      | <b>GDNF family receptor alpha 1</b>                                                                              | <b>Plasma Membrane</b> | <b>transmembrane receptor</b> |
| Q92854        | SEMA4D       | 2                        | 3.23E-03             | sema domain, immunoglobulin domain (Ig), transmembrane domain (TM) and short cytoplasmic domain, (semaphorin) 4D | Plasma Membrane        | other                         |
| P28482        | MAPK1        | 1.9                      | 3.41E-03             | mitogen-activated protein kinase 1                                                                               | Cytoplasm              | kinase                        |
| P54687        | BCAT1        | 1.8                      | 3.16E-03             | branched chain amino-acid transaminase 1, cytosolic                                                              | Cytoplasm              | enzyme                        |
| P48725        | PCNT         | 1.8                      | 2.43E-03             | pericentrin                                                                                                      | Cytoplasm              | other                         |
| Q6GTX8        | LAIR1        | 1.8                      | 3.34E-03             | leukocyte-associated immunoglobulin-like receptor 1                                                              | Plasma Membrane        | transmembrane receptor        |
| P08700        | IL3          | 1.8                      | 2.13E-03             | interleukin 3 (colony-stimulating factor, multiple)                                                              | Extracellular Space    | other                         |
| O14920        | IKBKB        | 1.8                      | 3.83E-03             | inhibitor of kappa light polypeptide gene enhancer in B-cells, kinase beta                                       | Cytoplasm              | kinase                        |
| <b>P09874</b> | <b>PARP1</b> | <b>1.8</b>               | <b>4.00E-05</b>      | <b>poly (ADP-ribose) polymerase 1</b>                                                                            | <b>Nucleus</b>         | <b>enzyme</b>                 |
| P11233        | RALA         | 1.8                      | 5.67E-03             | v-ral simian leukemia viral oncogene homolog A (ras related)                                                     | Cytoplasm              | enzyme                        |
| Q14980        | NUMA1        | 1.8                      | 3.56E-02             | nuclear mitotic apparatus protein 1                                                                              | Nucleus                | other                         |
| Q9NQX3        | GPHN         | 1.8                      | 1.34E-03             | gephyrin                                                                                                         | Plasma Membrane        | enzyme                        |

|        |        |     |          |                                                                                              |                 |                            |
|--------|--------|-----|----------|----------------------------------------------------------------------------------------------|-----------------|----------------------------|
| P12956 | XRCC6  | 1.7 | 1.14E-03 | X-ray repair complementing defective repair in Chinese hamster cells 6                       | Nucleus         | enzyme                     |
| P49736 | MCM2   | 1.7 | 3.92E-03 | minichromosome maintenance complex component 2                                               | Nucleus         | enzyme                     |
| Q12828 | FUBP1  | 1.7 | 3.10E-04 | far upstream element (FUSE) binding protein 1                                                | Nucleus         | transcription regulator    |
| O75884 | RBBP9  | 1.7 | 9.46E-03 | retinoblastoma binding protein 9                                                             | Nucleus         | other                      |
| P06239 | LCK    | 1.7 | 7.33E-03 | lymphocyte-specific protein tyrosine kinase                                                  | Cytoplasm       | kinase                     |
| Q13371 | PDCL   | 1.7 | 7.70E-04 | phosducin-like                                                                               | Cytoplasm       | enzyme                     |
| Q14209 | E2F2   | 1.7 | 9.30E-04 | E2F transcription factor 2                                                                   | Nucleus         | transcription regulator    |
| Q92529 | SHC3   | 1.7 | 7.13E-03 | SHC (Src homology 2 domain containing) transforming protein 3                                | Cytoplasm       | other                      |
| P28223 | HTR2A  | 1.6 | 1.22E-02 | 5-hydroxytryptamine (serotonin) receptor 2A                                                  | Plasma Membrane | G-protein coupled receptor |
| P50552 | VASP   | 1.6 | 2.96E-03 | vasodilator-stimulated phosphoprotein                                                        | Plasma Membrane | other                      |
| Q13115 | DUSP4  | 1.6 | 1.41E-02 | dual specificity phosphatase 4                                                               | Nucleus         | phosphatase                |
| Q13439 | GOLGA4 | 1.6 | 6.34E-03 | golgin A4                                                                                    | Cytoplasm       | other                      |
| P05556 | ITGB1  | 1.6 | 6.90E-04 | integrin, beta 1 (fibronectin receptor, beta polypeptide, antigen CD29 includes MDF2, MSK12) | Plasma Membrane | transmembrane receptor     |
| P27540 | ARNT   | 1.6 | 2.60E-04 | aryl hydrocarbon receptor nuclear translocator                                               | Nucleus         | transcription regulator    |

|        |         |     |          |                                                                                                                                 |                 |                         |
|--------|---------|-----|----------|---------------------------------------------------------------------------------------------------------------------------------|-----------------|-------------------------|
| P07992 | ERCC1   | 1.6 | 2.11E-03 | excision repair cross-complementing rodent repair deficiency, complementation group 1 (includes overlapping antisense sequence) | Nucleus         | enzyme                  |
| Q08209 | PPP3CA  | 1.6 | 3.62E-03 | protein phosphatase 3, catalytic subunit, alpha isozyme                                                                         | Cytoplasm       | phosphatase             |
| P29597 | TYK2    | 1.6 | 4.80E-04 | tyrosine kinase 2                                                                                                               | Plasma Membrane | kinase                  |
| Q9ULB1 | NRXN1   | 1.6 | 3.07E-03 | neurexin 1                                                                                                                      | Plasma Membrane | transporter             |
| P23458 | JAK1    | 1.6 | 2.92E-03 | Janus kinase 1                                                                                                                  | Cytoplasm       | kinase                  |
| P09525 | ANXA4   | 1.6 | 4.34E-03 | annexin A4                                                                                                                      | Plasma Membrane | other                   |
| P35568 | IRS1    | 1.6 | 6.50E-04 | insulin receptor substrate 1                                                                                                    | Cytoplasm       | other                   |
| Q02880 | TOP2B   | 1.6 | 1.45E-03 | topoisomerase (DNA) II beta 180kDa                                                                                              | Nucleus         | enzyme                  |
| P17301 | ITGA2   | 1.6 | 6.90E-04 | integrin, alpha 2 (CD49B, alpha 2 subunit of VLA-2 receptor)                                                                    | Plasma Membrane | other                   |
| P11488 | GNAT1   | 1.6 | 8.00E-04 | guanine nucleotide binding protein (G protein), alpha transducing activity polypeptide 1                                        | Plasma Membrane | enzyme                  |
| O43294 | TGFB111 | 1.6 | 2.40E-04 | transforming growth factor beta 1 induced transcript 1                                                                          | Nucleus         | transcription regulator |
| P43146 | DCC     | 1.5 | 3.68E-03 | deleted in colorectal carcinoma                                                                                                 | Plasma Membrane | transmembrane receptor  |
| P24385 | CCND1   | 1.5 | 9.90E-04 | cyclin D1                                                                                                                       | Nucleus         | other                   |
| Q9H4B4 | PLK3    | 1.5 | 5.17E-03 | polo-like kinase 3                                                                                                              | Nucleus         | kinase                  |
| P49427 | CDC34   | 1.5 | 2.40E-04 | cell division cycle 34 homolog ( <i>S. cerevisiae</i> )                                                                         | Nucleus         | enzyme                  |
| Q12929 | EPS8    | 1.5 | 1.55E-03 | epidermal growth factor receptor pathway substrate 8                                                                            | Plasma Membrane | peptidase               |

|               |              |            |                 |                                                                             |                        |                                    |
|---------------|--------------|------------|-----------------|-----------------------------------------------------------------------------|------------------------|------------------------------------|
| Q9NVN2        | SLC4A1A<br>P | 1.5        | 2.46E-03        | solute carrier family 4<br>(anion exchanger),<br>member 1, adaptor protein  | Cytoplasm              | transporter                        |
| Q12873        | CHD3         | 1.5        | 1.09E-03        | chromodomain helicase<br>DNA binding protein 3                              | Nucleus                | enzyme                             |
| <b>Q01130</b> | <b>SRSF2</b> | <b>1.5</b> | <b>4.00E-06</b> | <b>serine/arginine-rich<br/>splicing factor 2</b>                           | <b>Nucleus</b>         | <b>transcription<br/>regulator</b> |
| P40337        | VHL          | 1.5        | 2.86E-03        | von Hippel-Lindau tumor<br>suppressor                                       | Nucleus                | other                              |
| Q99960        | PKP2         | 1.5        | 3.32E-03        | plakophilin 2                                                               | Plasma<br>Membrane     | other                              |
| P29350        | PTPN6        | 1.5        | 7.40E-03        | protein tyrosine<br>phosphatase, non-receptor<br>type 6                     | Cytoplasm              | phosphatase                        |
| <b>P52292</b> | <b>KPNA2</b> | <b>1.5</b> | <b>1.90E-04</b> | <b>karyopherin alpha 2<br/>(RAG cohort 1, importin<br/>alpha 1)</b>         | <b>Nucleus</b>         | <b>transporter</b>                 |
| P49023        | PXN          | 1.5        | 5.18E-02        | paxillin                                                                    | Cytoplasm              | other                              |
| Q07666        | KHDRBS1      | 1.4        | 3.06E-03        | KH domain containing,<br>RNA binding, signal<br>transduction associated 1   | Nucleus                | transcription<br>regulator         |
| Q16513        | PKN2         | 1.4        | 2.99E-03        | protein kinase N2                                                           | Cytoplasm              | kinase                             |
| P11229        | CHRM1        | 1.4        | 6.09E-03        | cholinergic receptor,<br>muscarinic 1                                       | Plasma<br>Membrane     | G-protein<br>coupled receptor      |
| Q9H252        | KCNH6        | 1.4        | 1.34E-01        | potassium voltage-gated<br>channel, subfamily H (eag-<br>related), member 6 | Plasma<br>Membrane     | ion channel                        |
| P11387        | TOP1         | 1.4        | 6.97E-03        | topoisomerase (DNA) I                                                       | Nucleus                | enzyme                             |
| O00499        | BIN1         | 1.4        | 4.72E-03        | bridging integrator 1                                                       | Nucleus                | other                              |
| P02649        | APOE         | 1.4        | 2.73E-03        | apolipoprotein E                                                            | Extracellular<br>Space | transporter                        |
| P13861        | PRKAR2A      | 1.4        | 4.02E-03        | protein kinase, cAMP-<br>dependent, regulatory,<br>type II, alpha           | Cytoplasm              | kinase                             |
| Q969Q5        | RAB24        | 1.4        | 1.04E-02        | RAB24, member RAS<br>oncogene family                                        | unknown                | other                              |

|               |              |            |                 |                                                              |                     |                                |
|---------------|--------------|------------|-----------------|--------------------------------------------------------------|---------------------|--------------------------------|
| P35221        | CTNNA1       | 1.4        | 2.30E-03        | catenin (cadherin-associated protein), alpha 1, 102kDa       | Plasma Membrane     | other                          |
| Q06124        | PTPN11       | 1.4        | 1.26E-02        | protein tyrosine phosphatase, non-receptor type 11           | Cytoplasm           | phosphatase                    |
| P49185        | MAPK8        | 1.4        | 7.91E-03        | mitogen-activated protein kinase 8                           | Cytoplasm           | kinase                         |
| <b>Q9UHI6</b> | <b>DDX20</b> | <b>1.4</b> | <b>1.90E-04</b> | <b>DEAD (Asp-Glu-Ala-Asp) box polypeptide 20</b>             | <b>Nucleus</b>      | <b>transcription regulator</b> |
| O60588        | CEP250       | 1.4        | 1.60E-02        | centrosomal protein 250kDa                                   | Nucleus             | other                          |
| P33151        | CDH5         | 1.4        | 9.70E-04        | cadherin 5, type 2 (vascular endothelium)                    | Plasma Membrane     | other                          |
| P53041        | PPP5C        | 1.4        | 6.92E-02        | protein phosphatase 5, catalytic subunit                     | Nucleus             | phosphatase                    |
| P05060        | CHGB         | 1.4        | 1.46E-02        | chromogranin B (secretogranin 1)                             | Extracellular Space | other                          |
| O14617        | AP3D1        | 1.4        | 1.73E-02        | adaptor-related protein complex 3, delta 1 subunit           | Cytoplasm           | transporter                    |
| P28340        | POLD1        | 1.4        | 3.48E-03        | polymerase (DNA directed), delta 1, catalytic subunit 125kDa | Nucleus             | enzyme                         |
| Q99638        | RAD9A        | 1.4        | 9.74E-02        | RAD9 homolog A (S. pombe)                                    | Nucleus             | enzyme                         |
| P30281        | CCND3        | 1.4        | 3.50E-04        | cyclin D3                                                    | Nucleus             | other                          |
| O43933        | PEX1         | 1.4        | 5.92E-03        | peroxisomal biogenesis factor 1                              | Cytoplasm           | enzyme                         |
| Q13617        | CUL2         | 1.4        | 7.85E-03        | cullin 2                                                     | Nucleus             | enzyme                         |
| P07339        | CTSD         | 1.4        | 4.24E-03        | cathepsin D                                                  | Cytoplasm           | peptidase                      |
| P19174        | PLCG1        | 1.4        | 3.26E-02        | phospholipase C, gamma 1                                     | Cytoplasm           | enzyme                         |
| Q92620        | DHX38        | 1.3        | 1.94E-02        | DEAH (Asp-Glu-Ala-His) box polypeptide 38                    | Nucleus             | enzyme                         |
| Q62868        | ROCK2        | 1.3        | 3.26E-02        | Rho-associated, coiled-coil containing protein kinase 2      | Cytoplasm           | kinase                         |
| P50613        | CDK7         | 1.3        | 9.20E-04        | cyclin-dependent kinase 7                                    | Nucleus             | kinase                         |
| P00533        | EGFR         | 1.3        | 3.09E-02        | epidermal growth factor receptor                             | Plasma Membrane     | kinase                         |

|               |              |            |                 |                                                                     |                  |                         |
|---------------|--------------|------------|-----------------|---------------------------------------------------------------------|------------------|-------------------------|
| Q9BY75        | ITCH         | 1.3        | 8.59E-03        | itchy E3 ubiquitin protein ligase homolog (mouse)                   | Nucleus          | enzyme                  |
| P55060        | CSE1L        | 1.3        | 7.95E-03        | CSE1 chromosome segregation 1-like (yeast)                          | Nucleus          | transporter             |
| O75746        | SLC25A1<br>2 | 1.3        | 3.95E-03        | solute carrier family 25 (mitochondrial carrier, Aralar), member 12 | Cytoplasm        | transporter             |
| <b>P18031</b> | <b>PTPN1</b> | <b>1.3</b> | <b>1.50E-04</b> | <b>protein tyrosine phosphatase, non-receptor type 1</b>            | <b>Cytoplasm</b> | <b>phosphatase</b>      |
| P27824        | CANX         | 1.3        | 2.56E-02        | calnexin                                                            | Cytoplasm        | other                   |
| P04839        | CYBB         | 1.3        | 9.10E-02        | cytochrome b-245, beta polypeptide                                  | Cytoplasm        | enzyme                  |
| Q13443        | ADAM9        | 1.3        | 4.91E-03        | ADAM metalloproteinase domain 9                                     | Plasma Membrane  | peptidase               |
| Q16512        | PKN1         | 1.3        | 1.24E-02        | protein kinase N1                                                   | Cytoplasm        | kinase                  |
| O43602        | DCX          | 1.3        | 1.54E-03        | doublecortin                                                        | Cytoplasm        | other                   |
| O75498        | BLNK         | 1.3        | 1.38E-01        | B-cell linker                                                       | Cytoplasm        | other                   |
| Q09028        | RBBP4        | 1.3        | 5.35E-03        | retinoblastoma binding protein 4                                    | Nucleus          | enzyme                  |
| O15350        | TP73         | 1.3        | 9.86E-03        | tumor protein p73                                                   | Nucleus          | transcription regulator |
| O70161        | PIP5K1C      | 1.3        | 1.12E-01        | phosphatidylinositol-4-phosphate 5-kinase, type I, gamma            | Plasma Membrane  | kinase                  |
| P55010        | EIF5         | 1.3        | 3.30E-04        | eukaryotic translation initiation factor 5                          | Cytoplasm        | translation regulator   |
| Q9NYM9        | BET1L        | 1.3        | 7.37E-03        | blocked early in transport 1 homolog ( <i>S. cerevisiae</i> )-like  | Cytoplasm        | transporter             |
| Q16667        | CDKN3        | 1.3        | 9.77E-02        | cyclin-dependent kinase inhibitor 3                                 | Nucleus          | phosphatase             |
| O14578        | CIT          | 1.3        | 1.68E-01        | citron (rho-interacting, serine/threonine kinase 21)                | Cytoplasm        | kinase                  |
| P08567        | PLEK         | 1.3        | 2.86E-03        | pleckstrin                                                          | Cytoplasm        | other                   |
| P42166        | TMPO         | 1.3        | 2.92E-03        | thymopoietin                                                        | Nucleus          | other                   |
| P10415        | BCL2         | 1.3        | 2.51E-03        | B-cell CLL/lymphoma 2                                               | Cytoplasm        | other                   |
| P17677        | GAP43        | 1.3        | 9.00E-03        | growth associated protein 43                                        | Plasma Membrane  | other                   |

|        |          |     |          |                                                                           |                     |                                   |
|--------|----------|-----|----------|---------------------------------------------------------------------------|---------------------|-----------------------------------|
| Q92886 | NEUROG1  | 1.3 | 8.93E-02 | neurogenin 1                                                              | Nucleus             | transcription regulator           |
| Q9UHG3 | PCYOX1   | 1.3 | 8.77E-03 | prenylcysteine oxidase 1                                                  | Cytoplasm           | enzyme                            |
| Q9ULV5 | HSF4     | 1.3 | 1.04E-02 | heat shock transcription factor 4                                         | Nucleus             | transcription regulator           |
| P04150 | NR3C1    | 1.3 | 2.54E-03 | nuclear receptor subfamily 3, group C, member 1 (glucocorticoid receptor) | Nucleus             | ligand-dependent nuclear receptor |
| O95351 | HSPBP1   | 1.3 | 2.57E-03 | HSPA (heat shock 70kDa) binding protein, cytoplasmic cochaperone 1        | unknown             | other                             |
| P98082 | DAB2     | 1.3 | 1.18E-02 | disabled homolog 2, mitogen-responsive phosphoprotein (Drosophila)        | Plasma Membrane     | other                             |
| O14776 | TCERG1   | 1.3 | 4.81E-03 | transcription elongation regulator 1                                      | Nucleus             | transcription regulator           |
| P28335 | HTR2C    | 1.3 | 4.57E-02 | 5-hydroxytryptamine (serotonin) receptor 2C                               | Plasma Membrane     | G-protein coupled receptor        |
| Q12890 | SRPK1    | 1.3 | 3.17E-03 | SRSF protein kinase 1                                                     | Nucleus             | kinase                            |
| P46934 | NEDD4    | 1.3 | 3.52E-03 | neural precursor cell expressed, developmentally down-regulated 4         | Cytoplasm           | enzyme                            |
| P14635 | CCNB1    | 1.3 | 6.32E-03 | cyclin B1                                                                 | Cytoplasm           | other                             |
| P05455 | SSB      | 1.2 | 4.34E-02 | Sjogren syndrome antigen B (autoantigen La)                               | Nucleus             | enzyme                            |
| Q9UPG4 | NCOA3    | 1.2 | 6.74E-03 | nuclear receptor coactivator 3                                            | Nucleus             | transcription regulator           |
| P26992 | CNTFR    | 1.2 | 5.66E-03 | ciliary neurotrophic factor receptor                                      | Plasma Membrane     | transmembrane receptor            |
| P36952 | SERPINB5 | 1.2 | 1.40E-02 | serpin peptidase inhibitor, clade B (ovalbumin), member 5                 | Extracellular Space | other                             |
| P25054 | APC      | 1.2 | 2.48E-03 | adenomatous polyposis coli                                                | Nucleus             | enzyme                            |
| Q13263 | TRIM28   | 1.2 | 1.46E-01 | tripartite motif containing 28                                            | Nucleus             | transcription regulator           |

|        |        |     |          |                                                                                       |                 |                         |
|--------|--------|-----|----------|---------------------------------------------------------------------------------------|-----------------|-------------------------|
| P37268 | FDFT1  | 1.2 | 1.93E-02 | farnesyl-diphosphate farnesyltransferase 1                                            | Cytoplasm       | enzyme                  |
| Q99523 | SORT1  | 1.2 | 9.08E-03 | sortilin 1                                                                            | Cytoplasm       | transporter             |
| Q9NR28 | DIABLO | 1.2 | 3.48E-02 | diablo, IAP-binding mitochondrial protein                                             | Cytoplasm       | other                   |
| O60620 | KATNB1 | 1.2 | 2.10E-04 | katanin p80 (WD repeat containing) subunit B 1                                        | Cytoplasm       | enzyme                  |
| P49327 | FASN   | 1.2 | 8.30E-03 | fatty acid synthase                                                                   | Cytoplasm       | enzyme                  |
| Q8TCG7 | XIRP1  | 1.2 | 1.36E-01 | xin actin-binding repeat containing 1                                                 | Plasma Membrane | other                   |
| Q9Y6Q3 | ZFP37  | 1.2 | 4.10E-03 | zinc finger protein 37 homolog (mouse)                                                | Nucleus         | transcription regulator |
| P29475 | NOS1   | 1.2 | 1.33E-03 | nitric oxide synthase 1 (neuronal)                                                    | Cytoplasm       | enzyme                  |
| P39748 | FEN1   | 1.2 | 1.04E-02 | flap structure-specific endonuclease 1                                                | Nucleus         | enzyme                  |
| Q9Y6E0 | STK24  | 1.2 | 1.35E-01 | serine/threonine kinase 24                                                            | Cytoplasm       | kinase                  |
| O00221 | NFKBIE | 1.2 | 1.89E-02 | nuclear factor of kappa light polypeptide gene enhancer in B-cells inhibitor, epsilon | Nucleus         | transcription regulator |
| P23025 | XPA    | 1.2 | 2.15E-02 | xeroderma pigmentosum, complementation group A                                        | Nucleus         | other                   |
| Q96AY3 | FKBP10 | 1.2 | 1.57E-02 | FK506 binding protein 10, 65 kDa                                                      | Cytoplasm       | enzyme                  |
| O43913 | ORC5   | 1.2 | 1.06E-02 | origin recognition complex, subunit 5                                                 | Nucleus         | other                   |
| Q9Y250 | LZTS1  | 1.2 | 4.40E-04 | leucine zipper, putative tumor suppressor 1                                           | Nucleus         | transcription regulator |
| P40692 | MLH1   | 1.2 | 5.65E-03 | mutL homolog 1, colon cancer, nonpolyposis type 2 (E. coli)                           | Nucleus         | enzyme                  |
| Q13158 | FADD   | 1.2 | 6.55E-03 | Fas (TNFRSF6)-associated via death domain                                             | Cytoplasm       | other                   |



|        |         |     |          |                                                                                                        |                     |                         |
|--------|---------|-----|----------|--------------------------------------------------------------------------------------------------------|---------------------|-------------------------|
| Q14254 | FLOT2   | 1.2 | 7.84E-03 | flotillin 2                                                                                            | Plasma Membrane     | other                   |
| P18754 | RCC1    | 1.2 | 2.06E-02 | regulator of chromosome condensation 1                                                                 | Cytoplasm           | other                   |
| Q92748 | THRSP   | 1.2 | 3.81E-03 | thyroid hormone responsive                                                                             | Nucleus             | other                   |
| Q9BPW1 | TREX1   | 1.2 | 1.84E-02 | three prime repair exonuclease 1                                                                       | Nucleus             | enzyme                  |
| Q9Z2Y3 | HOMER1  | 1.2 | 8.04E-02 | homer homolog 1 (Drosophila)                                                                           | Plasma Membrane     | other                   |
| Q9NYF8 | BCLAF1  | 1.2 | 6.28E-02 | BCL2-associated transcription factor 1                                                                 | Nucleus             | transcription regulator |
| P55196 | MLLT4   | 1.2 | 8.91E-03 | myeloid/lymphoid or mixed-lineage leukemia (trithorax homolog, Drosophila); translocated to, 4         | Nucleus             | other                   |
| O14981 | BTAF1   | 1.2 | 4.59E-02 | BTAF1 RNA polymerase II, B-TFIID transcription factor-associated, 170kDa (Mot1 homolog, S. cerevisiae) | Nucleus             | transcription regulator |
| O14490 | DLGAP1  | 1.2 | 1.67E-01 | discs, large (Drosophila) homolog-associated protein 1                                                 | Plasma Membrane     | other                   |
| P47736 | RAP1GAP | 1.2 | 2.84E-02 | RAP1 GTPase activating protein                                                                         | Cytoplasm           | other                   |
| Q96DL0 | NEXN    | 1.2 | 2.84E-01 | nexilin (F actin binding protein)                                                                      | Plasma Membrane     | other                   |
| Q99730 | HTATSF1 | 1.2 | 9.80E-03 | HIV-1 Tat specific factor 1                                                                            | Nucleus             | transcription regulator |
| Q02548 | PAX5    | 1.2 | 1.55E-02 | paired box 5                                                                                           | Nucleus             | transcription regulator |
| O43684 | BUB3    | 1.2 | 2.37E-02 | budding uninhibited by benzimidazoles 3 homolog (yeast)                                                | Nucleus             | other                   |
| P30658 | CBX2    | 1.2 | 7.88E-03 | chromobox homolog 2                                                                                    | Nucleus             | transcription regulator |
| P04114 | APOB    | 1.2 | 4.01E-03 | apolipoprotein B (including Ag(x) antigen)                                                             | Extracellular Space | transporter             |
| P46013 | MKI67   | 1.2 | 1.50E-01 | antigen identified by monoclonal antibody Ki-67                                                        | Nucleus             | other                   |

|               |               |            |                 |                                                                                         |                        |                                |
|---------------|---------------|------------|-----------------|-----------------------------------------------------------------------------------------|------------------------|--------------------------------|
| P52565        | ARHGDI A      | 1.2        | 2.07E-02        | Rho GDP dissociation inhibitor (GDI) alpha                                              | Cytoplasm              | other                          |
| P07900        | HSP90AA<br>1  | 1.2        | 1.46E-01        | heat shock protein 90kDa alpha (cytosolic), class A member 1                            | Cytoplasm              | enzyme                         |
| Q13323        | BIK           | 1.2        | 4.82E-03        | BCL2-interacting killer (apoptosis-inducing)                                            | Cytoplasm              | other                          |
| <b>P24864</b> | <b>CCNE1</b>  | <b>1.2</b> | <b>4.00E-05</b> | <b>cyclin E1</b>                                                                        | <b>Nucleus</b>         | <b>transcription regulator</b> |
| Q9BR65        | HRAS          | 1.2        | 4.39E-03        | v-Ha-ras Harvey rat sarcoma viral oncogene homolog                                      | Plasma Membrane        | enzyme                         |
| P40763        | STAT3         | 1.2        | 8.00E-04        | signal transducer and activator of transcription 3 (acute-phase response factor)        | Nucleus                | transcription regulator        |
| P46108        | CRK           | 1.2        | 1.55E-02        | v-crck sarcoma virus CT10 oncogene homolog (avian)                                      | Cytoplasm              | other                          |
| P14136        | GFAP          | 1.2        | 3.88E-02        | glial fibrillary acidic protein                                                         | Cytoplasm              | other                          |
| Q16665        | HIF1A         | 1.2        | 6.10E-04        | hypoxia inducible factor 1, alpha subunit (basic helix-loop-helix transcription factor) | Nucleus                | transcription regulator        |
| <b>Q13224</b> | <b>GRIN2B</b> | <b>1.2</b> | <b>1.20E-04</b> | <b>glutamate receptor, ionotropic, N-methyl D-aspartate 2B</b>                          | <b>Plasma Membrane</b> | <b>ion channel</b>             |
| P04637        | TP53          | 1.2        | 1.60E-02        | tumor protein p53                                                                       | Nucleus                | transcription regulator        |
| Q99704        | DOK1          | 1.2        | 3.93E-02        | docking protein 1, 62kDa (downstream of tyrosine kinase 1)                              | Plasma Membrane        | other                          |
| Q9UPH5        | DNM2          | 1.1        | 3.99E-03        | dynamins 2                                                                              | Plasma Membrane        | enzyme                         |
| Q9Y624        | F11R          | 1.1        | 1.93E-03        | F11 receptor                                                                            | Plasma Membrane        | other                          |
| Q92598        | HSPH1         | 1.1        | 2.29E-02        | heat shock 105kDa/110kDa protein 1                                                      | Cytoplasm              | other                          |
| Q15185        | PTGES3        | 1.1        | 5.51E-02        | prostaglandin E synthase 3 (cytosolic)                                                  | Cytoplasm              | enzyme                         |

|        |        |     |          |                                                                                                           |                     |                         |
|--------|--------|-----|----------|-----------------------------------------------------------------------------------------------------------|---------------------|-------------------------|
| P20338 | RAB4A  | 1.1 | 1.04E-02 | RAB4A, member RAS oncogene family                                                                         | Cytoplasm           | enzyme                  |
| P43403 | ZAP70  | 1.1 | 4.92E-03 | zeta-chain (TCR) associated protein kinase 70kDa                                                          | Plasma Membrane     | kinase                  |
| Q01814 | ATP2B2 | 1.1 | 1.01E-02 | ATPase, Ca <sup>++</sup> transporting, plasma membrane 2                                                  | Plasma Membrane     | transporter             |
| P20248 | CCNA2  | 1.1 | 6.38E-02 | cyclin A2                                                                                                 | Nucleus             | other                   |
| Q08999 | RBL2   | 1.1 | 1.46E-01 | retinoblastoma-like 2 (p130)                                                                              | Nucleus             | other                   |
| P35228 | NOS2   | 1.1 | 9.20E-03 | nitric oxide synthase 2, inducible                                                                        | Cytoplasm           | enzyme                  |
| P42226 | STAT6  | 1.1 | 9.57E-03 | signal transducer and activator of transcription 6, interleukin-4 induced                                 | Nucleus             | transcription regulator |
| O75521 | ECI2   | 1.1 | 2.74E-02 | enoyl-CoA delta isomerase 2                                                                               | Cytoplasm           | enzyme                  |
| P07947 | YES1   | 1.1 | 2.56E-02 | v-yes-1 Yamaguchi sarcoma viral oncogene homolog 1                                                        | Cytoplasm           | kinase                  |
| P38936 | CDKN1A | 1.1 | 1.19E-01 | cyclin-dependent kinase inhibitor 1A (p21, Cip1)                                                          | Nucleus             | other                   |
| P11802 | CDK4   | 1.1 | 9.13E-02 | cyclin-dependent kinase 4                                                                                 | Nucleus             | kinase                  |
| O75791 | GRAP2  | 1.1 | 1.27E-02 | GRB2-related adaptor protein 2                                                                            | Cytoplasm           | other                   |
| P29459 | IL12A  | 1.1 | 2.54E-02 | interleukin 12A (natural killer cell stimulatory factor 1, cytotoxic lymphocyte maturation factor 1, p35) | Extracellular Space | cytokine                |
| P10586 | PTPRF  | 1.1 | 1.66E-02 | protein tyrosine phosphatase, receptor type, F                                                            | Plasma Membrane     | phosphatase             |
| Q14221 | EEA1   | 1.1 | 1.06E-02 | early endosome antigen 1                                                                                  | Cytoplasm           | other                   |
| P14317 | HCLS1  | 1.1 | 4.21E-02 | hematopoietic cell-specific Lyn substrate 1                                                               | Nucleus             | transcription regulator |

|        |        |     |          |                                                                   |                     |                         |
|--------|--------|-----|----------|-------------------------------------------------------------------|---------------------|-------------------------|
| P55212 | CASP6  | 1.1 | 3.62E-03 | caspase 6, apoptosis-related cysteine peptidase                   | Cytoplasm           | peptidase               |
| P28347 | TEAD1  | 1.1 | 8.67E-03 | TEA domain family member 1 (SV40 transcriptional enhancer factor) | Nucleus             | transcription regulator |
| Q9NQ66 | PLCB1  | 1.1 | 1.76E-01 | phospholipase C, beta 1 (phosphoinositide-specific)               | Cytoplasm           | enzyme                  |
| Q14186 | TFDP1  | 1.1 | 4.45E-03 | transcription factor Dp-1                                         | Nucleus             | transcription regulator |
| P10645 | CHGA   | 1.1 | 7.22E-03 | chromogranin A (parathyroid secretory protein 1)                  | Extracellular Space | other                   |
| P51965 | UBE2E1 | 1.1 | 1.44E-02 | ubiquitin-conjugating enzyme E2E 1                                | Cytoplasm           | enzyme                  |
| P55210 | CASP7  | 1.1 | 7.07E-02 | caspase 7, apoptosis-related cysteine peptidase                   | Cytoplasm           | peptidase               |
| O15359 | GTF2I  | 1.1 | 7.01E-03 | general transcription factor Iii                                  | Nucleus             | transcription regulator |
| O15075 | DCLK1  | 1.1 | 6.35E-02 | doublecortin-like kinase 1                                        | Plasma Membrane     | kinase                  |
| Q02156 | PRKCE  | 1.1 | 1.49E-02 | protein kinase C, epsilon                                         | Cytoplasm           | kinase                  |
| Q9NYF9 | GOLGA2 | 1.1 | 2.49E-02 | golgin A2                                                         | Cytoplasm           | other                   |
| P37198 | NUP62  | 1.1 | 8.13E-03 | nucleoporin 62kDa                                                 | Nucleus             | transporter             |
| Q9UPY8 | MAPRE3 | 1.1 | 1.45E-02 | microtubule-associated protein, RP/EB family, member 3            | Cytoplasm           | enzyme                  |
| Q13137 | CALCO2 | 1.1 | 8.16E-03 | calcium binding and coiled-coil domain 2                          | Nucleus             | other                   |
| P30279 | CCND2  | 1.1 | 1.83E-01 | cyclin D2                                                         | Nucleus             | other                   |
| Q12959 | DLG1   | 1.1 | 6.00E-04 | discs, large homolog 1 (Drosophila)                               | Plasma Membrane     | kinase                  |
| Q13485 | SMAD4  | 1.1 | 1.73E-02 | SMAD family member 4                                              | Nucleus             | transcription regulator |
| Q12979 | ABR    | 1.1 | 6.16E-03 | active BCR-related gene                                           | Cytoplasm           | other                   |
| P19878 | NCF2   | 1.1 | 1.13E-01 | neutrophil cytosolic factor 2                                     | Cytoplasm           | enzyme                  |
| P06396 | GSN    | 1.1 | 5.33E-02 | gelsolin                                                          | Extracellular Space | other                   |

|        |         |     |          |                                                                              |                     |                         |
|--------|---------|-----|----------|------------------------------------------------------------------------------|---------------------|-------------------------|
| O00418 | EEF2K   | 1.1 | 1.21E-02 | eukaryotic elongation factor-2 kinase                                        | Cytoplasm           | kinase                  |
| P15918 | RAG1    | 1.1 | 4.07E-03 | recombination activating gene 1                                              | Nucleus             | enzyme                  |
| P02751 | FN1     | 1.1 | 8.38E-02 | fibronectin 1                                                                | Extracellular Space | enzyme                  |
| O75970 | MPDZ    | 1.1 | 6.21E-02 | multiple PDZ domain protein                                                  | Plasma Membrane     | other                   |
| O15111 | CHUK    | 1.1 | 2.01E-02 | conserved helix-loop-helix ubiquitous kinase                                 | Cytoplasm           | kinase                  |
| P15923 | TCF3    | 1.1 | 2.01E-02 | transcription factor 3 (E2A immunoglobulin enhancer binding factors E12/E47) | Nucleus             | transcription regulator |
| P52732 | KIF11   | 1.1 | 4.52E-02 | kinesin family member 11                                                     | Nucleus             | other                   |
| P51452 | DUSP3   | 1.1 | 5.30E-04 | dual specificity phosphatase 3                                               | Cytoplasm           | phosphatase             |
| P25101 | EDNRA   | 1.1 | 4.61E-02 | endothelin receptor type A                                                   | Plasma Membrane     | transmembrane receptor  |
| P98170 | XIAP    | 1.1 | 2.89E-02 | X-linked inhibitor of apoptosis                                              | Cytoplasm           | other                   |
| P53350 | PLK1    | 1.1 | 2.20E-02 | polo-like kinase 1                                                           | Nucleus             | kinase                  |
| Q12834 | CDC20   | 1.1 | 3.10E-02 | cell division cycle 20 homolog (S. cerevisiae)                               | Nucleus             | other                   |
| Q13367 | AP3B2   | 1.1 | 8.14E-02 | adaptor-related protein complex 3, beta 2 subunit                            | Cytoplasm           | transporter             |
| Q16543 | CDC37   | 1.1 | 2.83E-02 | cell division cycle 37 homolog (S. cerevisiae)                               | Cytoplasm           | other                   |
| Q15796 | SMAD2   | 1.1 | 6.32E-02 | SMAD family member 2                                                         | Nucleus             | transcription regulator |
| O60749 | SNX2    | 1.1 | 4.78E-03 | sorting nexin 2                                                              | Cytoplasm           | transporter             |
| Q15418 | RPS6KA1 | 1.1 | 3.87E-02 | ribosomal protein S6 kinase, 90kDa, polypeptide 1                            | Cytoplasm           | kinase                  |
| Q02410 | APBA1   | 1.1 | 3.04E-02 | amyloid beta (A4) precursor protein-binding, family A, member 1              | Cytoplasm           | transporter             |
| Q13632 | NPAT    | 1.1 | 5.12E-01 | nuclear protein, ataxia-telangiectasia locus                                 | Nucleus             | transcription regulator |

|        |          |     |          |                                                                           |                 |                         |
|--------|----------|-----|----------|---------------------------------------------------------------------------|-----------------|-------------------------|
| P13984 | GTF2F2   | 1.1 | 1.83E-02 | general transcription factor IIF, polypeptide 2, 30kDa                    | Nucleus         | transcription regulator |
| O60496 | DOK2     | 1.1 | 1.96E-02 | docking protein 2, 56kDa                                                  | Plasma Membrane | other                   |
| Q9Y218 | OPTN     | 1.1 | 2.00E-01 | optineurin                                                                | Cytoplasm       | other                   |
| P27695 | APEX1    | 1.1 | 2.67E-03 | APEX nuclease (multifunctional DNA repair enzyme) 1                       | Nucleus         | enzyme                  |
| P41236 | PPP1R2   | 1.1 | 4.23E-02 | protein phosphatase 1, regulatory (inhibitor) subunit 2                   | Cytoplasm       | phosphatase             |
| P43246 | MSH2     | 1.1 | 5.05E-01 | mutS homolog 2, colon cancer, nonpolyposis type 1 (E. coli)               | Nucleus         | enzyme                  |
| P11279 | LAMP1    | 1.1 | 1.12E-01 | lysosomal-associated membrane protein 1                                   | Plasma Membrane | other                   |
| Q15276 | RABEP1   | 1.1 | 1.62E-01 | rabaptin, RAB GTPase binding effector protein 1                           | Cytoplasm       | transporter             |
| Q9Y2Y0 | ARL2BP   | 1.1 | 1.04E-02 | ADP-ribosylation factor-like 2 binding protein                            | Cytoplasm       | transcription regulator |
| Q9HBL0 | TNS1     | 1.1 | 3.48E-02 | tensin 1                                                                  | Plasma Membrane | other                   |
| O60716 | CTNND1   | 1.1 | 3.34E-02 | catenin (cadherin-associated protein), delta 1                            | Nucleus         | other                   |
| O15264 | MAPK13   | 1.1 | 2.09E-01 | mitogen-activated protein kinase 13                                       | Cytoplasm       | kinase                  |
| Q9JJ19 | SLC9A3R1 | 1.1 | 1.71E-03 | solute carrier family 9 (sodium/hydrogen exchanger), member 3 regulator 1 | Plasma Membrane | other                   |
| Q04759 | PRKCQ    | 1.1 | 3.07E-01 | protein kinase C, theta                                                   | Cytoplasm       | kinase                  |
| Q13017 | ARHGAP5  | 1.1 | 1.50E-02 | Rho GTPase activating protein 5                                           | Cytoplasm       | enzyme                  |
| Q16611 | BAK1     | 1.1 | 1.94E-01 | BCL2-antagonist/killer 1                                                  | Cytoplasm       | other                   |
| P10809 | HSPD1    | 1.1 | 9.90E-04 | heat shock 60kDa protein 1 (chaperonin)                                   | Cytoplasm       | enzyme                  |
| O75471 | CDC40    | 1.1 | 1.21E-01 | cell division cycle 40 homolog (S. cerevisiae)                            | Nucleus         | other                   |

|        |         |   |          |                                                                                       |                 |                         |
|--------|---------|---|----------|---------------------------------------------------------------------------------------|-----------------|-------------------------|
| Q9NY44 | GSPT2   | 1 | 4.74E-01 | G1 to S phase transition 2                                                            | Cytoplasm       | translation regulator   |
| Q99700 | ATXN2   | 1 | 1.35E-02 | ataxin 2                                                                              | Nucleus         | other                   |
| P25963 | NFKBIA  | 1 | 4.81E-01 | nuclear factor of kappa light polypeptide gene enhancer in B-cells inhibitor, alpha   | Cytoplasm       | other                   |
| P52566 | ARHGDI2 | 1 | 1.84E-02 | Rho GDP dissociation inhibitor (GDI) beta                                             | Cytoplasm       | other                   |
| P11388 | TOP2A   | 1 | 9.32E-02 | topoisomerase (DNA) II alpha 170kDa                                                   | Nucleus         | enzyme                  |
| O15156 | ZBTB7B  | 1 | 1.06E-01 | zinc finger and BTB domain containing 7B                                              | Nucleus         | transcription regulator |
| Q05655 | PRKCD   | 1 | 2.65E-01 | protein kinase C, delta                                                               | Cytoplasm       | kinase                  |
| Q99567 | NUP88   | 1 | 3.69E-02 | nucleoporin 88kDa                                                                     | Nucleus         | transporter             |
| P20339 | RAB5A   | 1 | 1.10E-02 | RAB5A, member RAS oncogene family                                                     | Cytoplasm       | enzyme                  |
| P48764 | SLC9A3  | 1 | 2.82E-01 | solute carrier family 9 (sodium/hydrogen exchanger), member 3                         | Plasma Membrane | ion channel             |
| P07099 | EPHX1   | 1 | 2.84E-01 | epoxide hydrolase 1, microsomal (xenobiotic)                                          | Cytoplasm       | peptidase               |
| O43583 | DENR    | 1 | 1.02E-01 | density-regulated protein                                                             | unknown         | other                   |
| P18074 | ERCC2   | 1 | 8.88E-02 | excision repair cross-complementing rodent repair deficiency, complementation group 2 | Nucleus         | enzyme                  |
| P14222 | PRF1    | 1 | 3.32E-02 | perforin 1 (pore forming protein)                                                     | Cytoplasm       | other                   |
| P22303 | ACHE    | 1 | 1.81E-02 | acetylcholinesterase                                                                  | Plasma Membrane | enzyme                  |
| P41240 | CSK     | 1 | 1.56E-02 | c-src tyrosine kinase                                                                 | Cytoplasm       | kinase                  |

|        |        |   |          |                                                                                                                |                     |                         |
|--------|--------|---|----------|----------------------------------------------------------------------------------------------------------------|---------------------|-------------------------|
| P04626 | ERBB2  | 1 | 7.49E-02 | v-erb-b2 erythroblastic leukemia viral oncogene homolog 2, neuro/glioblastoma derived oncogene homolog (avian) | Plasma Membrane     | kinase                  |
| P21964 | COMT   | 1 | 4.40E-01 | catechol-O-methyltransferase                                                                                   | Cytoplasm           | enzyme                  |
| Q14016 | SCARB1 | 1 | 1.40E-01 | scavenger receptor class B, member 1                                                                           | Plasma Membrane     | transporter             |
| Q92793 | CREBBP | 1 | 2.55E-01 | CREB binding protein                                                                                           | Nucleus             | transcription regulator |
| P49959 | MRE11A | 1 | 1.14E-01 | MRE11 meiotic recombination 11 homolog A ( <i>S. cerevisiae</i> )                                              | Nucleus             | enzyme                  |
| Q00610 | CLTC   | 1 | 4.68E-02 | clathrin, heavy chain (Hc)                                                                                     | Plasma Membrane     | other                   |
| O60446 | AURKB  | 1 | 5.57E-01 | aurora kinase B                                                                                                | Nucleus             | kinase                  |
| P16949 | STMN1  | 1 | 1.91E-01 | stathmin 1                                                                                                     | Cytoplasm           | other                   |
| Q15628 | TRADD  | 1 | 1.12E-01 | TNFRSF1A-associated via death domain                                                                           | Cytoplasm           | other                   |
| Q9UDT6 | CLIP2  | 1 | 1.56E-01 | CAP-GLY domain containing linker protein 2                                                                     | Cytoplasm           | transcription regulator |
| P80098 | CCL7   | 1 | 7.26E-01 | chemokine (C-C motif) ligand 7                                                                                 | Extracellular Space | cytokine                |
| P54257 | HAP1   | 1 | 1.21E-01 | huntingtin-associated protein 1                                                                                | Cytoplasm           | other                   |
| O95980 | RECK   | 1 | 1.62E-01 | reversion-inducing-cysteine-rich protein with kazal motifs                                                     | Plasma Membrane     | other                   |
| P51636 | CAV2   | 1 | 1.79E-01 | caveolin 2                                                                                                     | Plasma Membrane     | other                   |
| P27816 | MAP4   | 1 | 1.70E-01 | microtubule-associated protein 4                                                                               | Cytoplasm           | other                   |
| O95782 | AP2A1  | 1 | 1.37E-01 | adaptor-related protein complex 2, alpha 1 subunit                                                             | Cytoplasm           | transporter             |
| Q13363 | CTBP1  | 1 | 3.37E-03 | C-terminal binding protein 1                                                                                   | Nucleus             | enzyme                  |
| Q16774 | GUK1   | 1 | 2.45E-01 | guanylate kinase 1                                                                                             | Cytoplasm           | kinase                  |
| P49407 | ARRB1  | 1 | 7.27E-01 | arrestin, beta 1                                                                                               | Cytoplasm           | other                   |
| Q05193 | DNM1   | 1 | 2.26E-01 | dynamin 1                                                                                                      | Cytoplasm           | enzyme                  |
| Q13043 | STK4   | 1 | 6.16E-01 | serine/threonine kinase 4                                                                                      | Cytoplasm           | kinase                  |
| P12004 | PCNA   | 1 | 5.93E-01 | proliferating cell nuclear antigen                                                                             | Nucleus             | enzyme                  |



|        |        |    |          |                                                                            |                     |                         |
|--------|--------|----|----------|----------------------------------------------------------------------------|---------------------|-------------------------|
| P14415 | ATP1B2 | 1  | 3.41E-01 | ATPase, Na <sup>+</sup> /K <sup>+</sup> transporting, beta 2 polypeptide   | Plasma Membrane     | transporter             |
| P37840 | SNCA   | 1  | 6.03E-02 | synuclein, alpha (non A4 component of amyloid precursor)                   | Cytoplasm           | other                   |
| P06493 | CDK1   | 1  | 3.10E-01 | cyclin-dependent kinase 1                                                  | Nucleus             | kinase                  |
| P49321 | NASP   | 1  | 6.73E-01 | nuclear autoantigenic sperm protein (histone-binding)                      | Nucleus             | other                   |
| O43396 | TXNL1  | -1 | 6.95E-02 | thioredoxin-like 1                                                         | Cytoplasm           | enzyme                  |
| O15117 | FYB    | -1 | 1.63E-01 | FYN binding protein                                                        | Nucleus             | other                   |
| P52701 | MSH6   | -1 | 4.55E-01 | mutS homolog 6 (E. coli)                                                   | Nucleus             | enzyme                  |
| P04141 | CSF2   | -1 | 7.76E-01 | colony stimulating factor 2 (granulocyte-macrophage)                       | Extracellular Space | cytokine                |
| P05771 | PRKCB  | -1 | 7.11E-02 | protein kinase C, beta                                                     | Cytoplasm           | kinase                  |
| Q9UBQ3 | PMF1   | -1 | 1.77E-01 | polyamine-modulated factor 1                                               | Nucleus             | transcription regulator |
| Q96M96 | FGD4   | -1 | 1.69E-01 | FYVE, RhoGEF and PH domain containing 4                                    | Cytoplasm           | other                   |
| P17252 | PRKCA  | -1 | 1.55E-01 | protein kinase C, alpha                                                    | Cytoplasm           | kinase                  |
| P56945 | BCAR1  | -1 | 4.32E-01 | breast cancer anti-estrogen resistance 1                                   | Plasma Membrane     | other                   |
| Q9UMT8 | MDM2   | -1 | 2.46E-02 | Mdm2 p53 binding protein homolog (mouse)                                   | Nucleus             | transcription regulator |
| Q92777 | SYN2   | -1 | 6.56E-02 | synapsin II                                                                | Plasma Membrane     | other                   |
| P33991 | MCM4   | -1 | 3.45E-01 | minichromosome maintenance complex component 4                             | Nucleus             | enzyme                  |
| P17643 | TYRP1  | -1 | 1.83E-01 | tyrosinase-related protein 1                                               | Cytoplasm           | enzyme                  |
| Q15369 | TCEB1  | -1 | 2.96E-01 | transcription elongation factor B (SIII), polypeptide 1 (15kDa, elongin C) | Nucleus             | transcription regulator |
| P10747 | CD28   | -1 | 4.36E-01 | CD28 molecule                                                              | Plasma Membrane     | other                   |

|        |        |    |          |                                                                        |                     |                         |
|--------|--------|----|----------|------------------------------------------------------------------------|---------------------|-------------------------|
| P15172 | MYOD1  | -1 | 5.69E-01 | myogenic differentiation 1                                             | Nucleus             | transcription regulator |
| P16870 | CPE    | -1 | 3.00E-01 | carboxypeptidase E                                                     | Plasma Membrane     | peptidase               |
| P33241 | LSP1   | -1 | 1.01E-01 | lymphocyte-specific protein 1                                          | Cytoplasm           | other                   |
| P24723 | PRKCH  | -1 | 3.65E-01 | protein kinase C, eta                                                  | Cytoplasm           | kinase                  |
| O60484 | SIPA1  | -1 | 1.68E-01 | signal-induced proliferation-associated 1                              | Cytoplasm           | other                   |
| Q04637 | EIF4G1 | -1 | 3.61E-01 | eukaryotic translation initiation factor 4 gamma, 1                    | Cytoplasm           | translation regulator   |
| Q09472 | EP300  | -1 | 2.58E-01 | E1A binding protein p300                                               | Nucleus             | transcription regulator |
| O76074 | PDE5A  | -1 | 4.36E-01 | phosphodiesterase 5A, cGMP-specific                                    | Cytoplasm           | enzyme                  |
| P35222 | CTNNB1 | -1 | 2.49E-01 | catenin (cadherin-associated protein), beta 1, 88kDa                   | Nucleus             | transcription regulator |
| P05106 | ITGB3  | -1 | 2.89E-02 | integrin, beta 3 (platelet glycoprotein IIIa, antigen CD61)            | Plasma Membrane     | transmembrane receptor  |
| Q05682 | CALD1  | -1 | 7.17E-02 | caldesmon 1                                                            | Cytoplasm           | other                   |
| Q9UEU0 | VTI1B  | -1 | 2.72E-01 | vesicle transport through interaction with t-SNAREs homolog 1B (yeast) | Plasma Membrane     | transporter             |
| P22676 | CALB2  | -1 | 6.66E-01 | calbindin 2                                                            | Cytoplasm           | other                   |
| Q15149 | PLEC   | -1 | 5.82E-01 | plectin                                                                | Cytoplasm           | other                   |
| Q04206 | RELA   | -1 | 6.65E-01 | v-rel reticuloendotheliosis viral oncogene homolog A (avian)           | Nucleus             | transcription regulator |
| Q9UBV9 | TP63   | -1 | 5.97E-02 | tumor protein p63                                                      | Nucleus             | transcription regulator |
| Q14449 | GRB14  | -1 | 6.10E-01 | growth factor receptor-bound protein 14                                | Plasma Membrane     | other                   |
| P70281 | SYCP3  | -1 | 7.35E-01 | synaptonemal complex protein 3                                         | Nucleus             | other                   |
| P05089 | ARG1   | -1 | 5.82E-01 | arginase, liver                                                        | Cytoplasm           | enzyme                  |
| Q09013 | DMPK   | -1 | 6.63E-01 | dystrophia myotonica-protein kinase                                    | Cytoplasm           | kinase                  |
| P01584 | IL1B   | -1 | 9.29E-01 | interleukin 1, beta                                                    | Extracellular Space | cytokine                |

|        |         |      |          |                                                                                    |                     |                         |
|--------|---------|------|----------|------------------------------------------------------------------------------------|---------------------|-------------------------|
| Q15554 | TERF2   | -1   | 4.14E-01 | telomeric repeat binding factor 2                                                  | Nucleus             | other                   |
| P13667 | PDIA4   | -1   | 3.20E-01 | protein disulfide isomerase family A, member 4                                     | Cytoplasm           | enzyme                  |
| P35225 | IL13    | -1   | 7.11E-01 | interleukin 13                                                                     | Extracellular Space | cytokine                |
| Q13094 | LCP2    | -1   | 8.93E-01 | lymphocyte cytosolic protein 2 (SH2 domain containing leukocyte protein of 76kDa)  | Cytoplasm           | other                   |
| P49848 | TAF6    | -1   | 6.60E-01 | TAF6 RNA polymerase II, TATA box binding protein (TBP)-associated factor, 80kDa    | Nucleus             | transcription regulator |
| O60462 | NRP2    | -1   | 8.12E-01 | neuropilin 2                                                                       | Plasma Membrane     | kinase                  |
| O95644 | NFATC1  | -1   | 8.70E-01 | nuclear factor of activated T-cells, cytoplasmic, calcineurin-dependent 1          | Nucleus             | transcription regulator |
| P31321 | PRKAR1B | -1   | 9.81E-01 | protein kinase, cAMP-dependent, regulatory, type I, beta                           | Cytoplasm           | kinase                  |
| P06730 | EIF4E   | -1   | 9.43E-01 | eukaryotic translation initiation factor 4E                                        | Cytoplasm           | translation regulator   |
| O60231 | DHX16   | -1   | 9.85E-01 | DEAH (Asp-Glu-Ala-His) box polypeptide 16                                          | Nucleus             | enzyme                  |
| Q01543 | FLI1    | -1   | 9.97E-01 | Friend leukemia virus integration 1                                                | Nucleus             | transcription regulator |
| P43487 | RANBP1  | -1   | 9.97E-01 | RAN binding protein 1                                                              | Nucleus             | other                   |
| Q12904 | AIMP1   | -1.1 | 4.50E-04 | aminoacyl tRNA synthetase complex-interacting multifunctional protein 1            | Extracellular Space | cytokine                |
| P25445 | FAS     | -1.1 | 1.99E-02 | Fas (TNF receptor superfamily, member 6)                                           | Plasma Membrane     | transmembrane receptor  |
| Q12917 | KCNMA1  | -1.1 | 8.23E-03 | potassium large conductance calcium-activated channel, subfamily M, alpha member 1 | Plasma Membrane     | ion channel             |

|        |             |      |          |                                                                     |                        |                                      |
|--------|-------------|------|----------|---------------------------------------------------------------------|------------------------|--------------------------------------|
| Q9NYH3 | CCNDBP<br>1 | -1.1 | 3.45E-03 | cyclin D-type binding-<br>protein 1                                 | Nucleus                | other                                |
| Q00403 | GTF2B       | -1.1 | 1.13E-01 | general transcription factor<br>IIB                                 | Nucleus                | transcription<br>regulator           |
| P07711 | CTSL1       | -1.1 | 1.91E-02 | cathepsin L1                                                        | Cytoplasm              | peptidase                            |
| O95196 | CSPG5       | -1.1 | 4.82E-02 | chondroitin sulfate<br>proteoglycan 5<br>(neuroglycan C)            | Extracellular<br>Space | growth factor                        |
| Q07157 | TJP1        | -1.1 | 1.40E-02 | tight junction protein 1<br>(zona occludens 1)                      | Plasma<br>Membrane     | other                                |
| Q07820 | MCL1        | -1.1 | 2.78E-03 | myeloid cell leukemia<br>sequence 1 (BCL2-<br>related)              | Cytoplasm              | transporter                          |
| P27361 | MAPK3       | -1.1 | 2.62E-02 | mitogen-activated protein<br>kinase 3                               | Cytoplasm              | kinase                               |
| P40855 | PEX19       | -1.1 | 2.94E-03 | peroxisomal biogenesis<br>factor 19                                 | Cytoplasm              | other                                |
| P23193 | TCEA1       | -1.1 | 3.16E-02 | transcription elongation<br>factor A (SII), 1                       | Nucleus                | transcription<br>regulator           |
| P09601 | HMOX1       | -1.1 | 4.90E-02 | heme oxygenase<br>(decycling) 1                                     | Cytoplasm              | enzyme                               |
| P22736 | NR4A1       | -1.1 | 2.23E-02 | nuclear receptor subfamily<br>4, group A, member 1                  | Nucleus                | ligand-dependent<br>nuclear receptor |
| P56545 | CTBP2       | -1.1 | 2.41E-02 | C-terminal binding protein<br>2                                     | Nucleus                | transcription<br>regulator           |
| Q15691 | MAPRE1      | -1.1 | 7.40E-03 | microtubule-associated<br>protein, RP/EB family,<br>member 1        | Cytoplasm              | other                                |
| P07333 | CSF1R       | -1.1 | 7.93E-02 | colony stimulating factor 1<br>receptor                             | Plasma<br>Membrane     | kinase                               |
| Q9BQH3 | CAMKK1      | -1.1 | 8.92E-02 | calcium/calmodulin-<br>dependent protein kinase<br>kinase 1, alpha  | Cytoplasm              | kinase                               |
| Q01085 | TIAL1       | -1.1 | 5.14E-03 | TIA1 cytotoxic granule-<br>associated RNA binding<br>protein-like 1 | Nucleus                | transcription<br>regulator           |
| O75363 | BCAS1       | -1.1 | 1.58E-02 | breast carcinoma amplified<br>sequence 1                            | Plasma<br>Membrane     | other                                |
| P21333 | FLNA        | -1.1 | 1.92E-02 | filamin A, alpha                                                    | Cytoplasm              | other                                |
| P55211 | CASP9       | -1.1 | 2.31E-02 | caspase 9, apoptosis-<br>related cysteine peptidase                 | Cytoplasm              | peptidase                            |
| Q9Y2T2 | AP3M1       | -1.1 | 1.06E-02 | adaptor-related protein<br>complex 3, mu 1 subunit                  | Cytoplasm              | transporter                          |

|        |        |      |          |                                                                           |                     |                         |
|--------|--------|------|----------|---------------------------------------------------------------------------|---------------------|-------------------------|
| Q13469 | NFATC2 | -1.1 | 6.00E-03 | nuclear factor of activated T-cells, cytoplasmic, calcineurin-dependent 2 | Nucleus             | transcription regulator |
| P49841 | GSK3B  | -1.1 | 9.36E-03 | glycogen synthase kinase 3 beta                                           | Nucleus             | kinase                  |
| Q14289 | PTK2B  | -1.1 | 4.24E-03 | PTK2B protein tyrosine kinase 2 beta                                      | Cytoplasm           | kinase                  |
| P35637 | FUS    | -1.1 | 1.44E-02 | fused in sarcoma                                                          | Nucleus             | transcription regulator |
| P78362 | SRPK2  | -1.1 | 9.95E-03 | SRSF protein kinase 2                                                     | Nucleus             | kinase                  |
| Q61548 | SNAP91 | -1.1 | 2.20E-02 | synaptosomal-associated protein, 91kDa homolog (mouse)                    | Plasma Membrane     | other                   |
| Q14566 | MCM6   | -1.1 | 1.44E-03 | minichromosome maintenance complex component 6                            | Nucleus             | enzyme                  |
| O43752 | STX6   | -1.1 | 4.01E-02 | syntaxin 6                                                                | Cytoplasm           | transporter             |
| P08247 | SYP    | -1.1 | 8.88E-02 | synaptophysin                                                             | Cytoplasm           | transporter             |
| P17936 | IGFBP3 | -1.1 | 1.86E-03 | insulin-like growth factor binding protein 3                              | Extracellular Space | other                   |
| Q13469 | NFATC2 | -1.1 | 1.18E-01 | nuclear factor of activated T-cells, cytoplasmic, calcineurin-dependent 2 | Nucleus             | transcription regulator |
| P41743 | PRKCI  | -1.1 | 7.90E-04 | protein kinase C, iota                                                    | Cytoplasm           | kinase                  |
| P30307 | CDC25C | -1.1 | 9.70E-03 | cell division cycle 25 homolog C (S. pombe)                               | Nucleus             | phosphatase             |
| Q08495 | EPB49  | -1.1 | 1.04E-01 | erythrocyte membrane protein band 4.9 (dematin)                           | Plasma Membrane     | other                   |
| Q13596 | SNX1   | -1.1 | 9.08E-02 | sorting nexin 1                                                           | Cytoplasm           | transporter             |
| Q13751 | LAMB3  | -1.1 | 8.61E-02 | laminin, beta 3                                                           | Extracellular Space | transporter             |
| Q92797 | SYMPK  | -1.1 | 3.84E-02 | symplekin                                                                 | Cytoplasm           | other                   |
| P26006 | ITGA3  | -1.1 | 1.40E-02 | integrin, alpha 3 (antigen CD49C, alpha 3 subunit of VLA-3 receptor)      | Plasma Membrane     | other                   |
| O08961 | ZNF423 | -1.1 | 1.27E-01 | zinc finger protein 423                                                   | Nucleus             | transcription regulator |
| Q07817 | BCL2L1 | -1.1 | 2.00E-01 | BCL2-like 1                                                               | Cytoplasm           | other                   |

|        |                   |      |          |                                                                                                   |                     |                                   |
|--------|-------------------|------|----------|---------------------------------------------------------------------------------------------------|---------------------|-----------------------------------|
| Q15233 | NONO              | -1.1 | 4.46E-01 | non-POU domain containing, octamer-binding                                                        | Nucleus             | other                             |
| O15066 | KIF3B             | -1.1 | 5.88E-02 | kinesin family member 3B                                                                          | Cytoplasm           | transporter                       |
| Q99598 | TSNAX             | -1.1 | 1.17E-02 | translin-associated factor X                                                                      | Nucleus             | transporter                       |
| P10275 | AR                | -1.1 | 3.13E-02 | androgen receptor                                                                                 | Nucleus             | ligand-dependent nuclear receptor |
| Q12933 | TRAF2             | -1.1 | 2.74E-01 | TNF receptor-associated factor 2                                                                  | Cytoplasm           | enzyme                            |
| P15531 | NME1              | -1.1 | 1.64E-01 | non-metastatic cells 1, protein (NM23A) expressed in                                              | Nucleus             | kinase                            |
| Q14573 | ITPR3             | -1.1 | 1.07E-01 | inositol 1,4,5-trisphosphate receptor, type 3                                                     | Cytoplasm           | ion channel                       |
| O75112 | LDB3              | -1.1 | 3.26E-01 | LIM domain binding 3                                                                              | Cytoplasm           | transporter                       |
| P51531 | SMARCA2           | -1.1 | 5.78E-03 | SWI/SNF related, matrix associated, actin dependent regulator of chromatin, subfamily a, member 2 | Nucleus             | transcription regulator           |
| P49418 | AMPH              | -1.2 | 1.13E-02 | amphiphysin                                                                                       | Plasma Membrane     | other                             |
| O75382 | TRIM3             | -1.2 | 2.87E-03 | tripartite motif containing 3                                                                     | Cytoplasm           | other                             |
| Q02388 | COL7A1            | -1.2 | 1.52E-03 | collagen, type VII, alpha 1                                                                       | Extracellular Space | other                             |
| P02753 | RBP4              | -1.2 | 1.44E-02 | retinol binding protein 4, plasma                                                                 | Extracellular Space | transporter                       |
| P20936 | RASA1             | -1.2 | 3.18E-02 | RAS p21 protein activator (GTPase activating protein) 1                                           | Cytoplasm           | transporter                       |
| Q9Y2D5 | AKAP2/PALM2-AKAP2 | -1.2 | 3.51E-02 | A kinase (PRKA) anchor protein 2                                                                  | Cytoplasm           | other                             |
| P15104 | GLUL              | -1.2 | 1.35E-03 | glutamate-ammonia ligase                                                                          | Cytoplasm           | enzyme                            |
| O43842 | NCF1              | -1.2 | 4.21E-02 | neutrophil cytosolic factor 1                                                                     | Cytoplasm           | enzyme                            |
| P49918 | CDKN1C            | -1.2 | 8.23E-03 | cyclin-dependent kinase inhibitor 1C (p57, Kip2)                                                  | Nucleus             | other                             |

|        |         |      |          |                                                              |                     |                         |
|--------|---------|------|----------|--------------------------------------------------------------|---------------------|-------------------------|
| P05113 | IL5     | -1.2 | 7.64E-03 | interleukin 5 (colony-stimulating factor, eosinophil)        | Extracellular Space | cytokine                |
| Q9UK56 | RASGRF2 | -1.2 | 1.99E-03 | Ras protein-specific guanine nucleotide-releasing factor 2   | Cytoplasm           | other                   |
| P17813 | ENG     | -1.2 | 1.69E-01 | endoglin                                                     | Plasma Membrane     | transmembrane receptor  |
| Q96A65 | EXOC4   | -1.2 | 2.90E-03 | exocyst complex component 4                                  | Cytoplasm           | transporter             |
| P48681 | NES     | -1.2 | 6.05E-03 | nestin                                                       | Cytoplasm           | other                   |
| O76043 | PTPRZ1  | -1.2 | 8.03E-02 | protein tyrosine phosphatase, receptor-type, Z polypeptide 1 | Plasma Membrane     | phosphatase             |
| Q15283 | RASA2   | -1.2 | 2.35E-02 | RAS p21 protein activator 2                                  | Cytoplasm           | other                   |
| Q07889 | SOS1    | -1.2 | 1.28E-03 | son of sevenless homolog 1 (Drosophila)                      | Cytoplasm           | other                   |
| P51955 | NEK2    | -1.2 | 8.10E-04 | NIMA (never in mitosis gene a)-related kinase 2              | Cytoplasm           | kinase                  |
| P15173 | MYOG    | -1.2 | 1.86E-01 | myogenin (myogenic factor 4)                                 | Nucleus             | transcription regulator |
| O15379 | HDAC3   | -1.2 | 7.56E-03 | histone deacetylase 3                                        | Nucleus             | transcription regulator |
| P16455 | MGMT    | -1.2 | 4.94E-03 | O-6-methylguanine-DNA methyltransferase                      | Nucleus             | enzyme                  |
| O14879 | IFIT3   | -1.2 | 5.21E-03 | interferon-induced protein with tetratricopeptide repeats 3  | Cytoplasm           | other                   |
| P26038 | MSN     | -1.2 | 3.90E-02 | moesin                                                       | Plasma Membrane     | other                   |
| O75759 | RANBP3  | -1.2 | 1.68E-01 | RAN binding protein 3                                        | Nucleus             | other                   |
| P49674 | CSNK1E  | -1.2 | 1.09E-03 | casein kinase 1, epsilon                                     | Cytoplasm           | kinase                  |
| O15145 | ARPC3   | -1.2 | 8.07E-03 | actin related protein 2/3 complex, subunit 3, 21kDa          | Cytoplasm           | other                   |
| Q92878 | RAD50   | -1.2 | 6.80E-04 | RAD50 homolog (S. cerevisiae)                                | Nucleus             | enzyme                  |
| P51116 | FXR2    | -1.2 | 1.22E-02 | fragile X mental retardation, autosomal homolog 2            | Cytoplasm           | other                   |

|               |              |             |                 |                                                                          |                            |                  |
|---------------|--------------|-------------|-----------------|--------------------------------------------------------------------------|----------------------------|------------------|
| P05231        | IL6          | -1.2        | 3.03E-02        | interleukin 6 (interferon, beta 2)                                       | Extracellular Space        | cytokine         |
| Q9NRF1        | SH2B1        | -1.2        | 1.38E-02        | SH2B adaptor protein 1                                                   | Cytoplasm                  | other            |
| P49662        | CASP4        | -1.2        | 2.12E-02        | caspase 4, apoptosis-related cysteine peptidase                          | Cytoplasm                  | peptidase        |
| O43561        | LAT          | -1.2        | 1.51E-03        | linker for activation of T cells                                         | Plasma Membrane            | other            |
| P31323        | PRKAR2B      | -1.2        | 2.59E-02        | protein kinase, cAMP-dependent, regulatory, type II, beta                | Cytoplasm                  | kinase           |
| P54105        | CLNS1A       | -1.2        | 6.07E-02        | chloride channel, nucleotide-sensitive, 1A                               | Plasma Membrane            | ion channel      |
| P51813        | BMX          | -1.2        | 1.50E-02        | BMX non-receptor tyrosine kinase                                         | Cytoplasm                  | kinase           |
| P04049        | RAF1         | -1.2        | 8.43E-03        | v-raf-1 murine leukemia viral oncogene homolog 1                         | Cytoplasm                  | kinase           |
| P07237        | P4HB         | -1.2        | 6.04E-03        | prolyl 4-hydroxylase, beta polypeptide                                   | Cytoplasm                  | enzyme           |
| P22223        | CDH3         | -1.2        | 1.20E-02        | cadherin 3, type 1, P-cadherin (placental)                               | Plasma Membrane            | other            |
| P30260        | CDC27        | -1.2        | 6.60E-03        | cell division cycle 27 homolog (S. cerevisiae)                           | Nucleus                    | other            |
| Q03135        | CAV1         | -1.3        | 1.90E-03        | caveolin 1, caveolae protein, 22kDa                                      | Plasma Membrane            | other            |
| P24863        | CCNC         | -1.3        | 9.40E-03        | cyclin C                                                                 | Nucleus                    | other            |
| <b>O43240</b> | <b>KLK10</b> | <b>-1.3</b> | <b>1.00E-05</b> | <b>kallikrein-related peptidase 10</b>                                   | <b>Extracellular Space</b> | <b>peptidase</b> |
| P50995        | ANXA11       | -1.3        | 6.40E-04        | annexin A11                                                              | Nucleus                    | other            |
| O00273        | DFFA         | -1.3        | 1.49E-03        | DNA fragmentation factor, 45kDa, alpha polypeptide                       | Nucleus                    | enzyme           |
| P54709        | ATP1B3       | -1.3        | 2.39E-02        | ATPase, Na <sup>+</sup> /K <sup>+</sup> transporting, beta 3 polypeptide | Plasma Membrane            | transporter      |
| Q13586        | STIM1        | -1.3        | 1.13E-03        | stromal interaction molecule 1                                           | Plasma Membrane            | other            |
| O95368        | PSIP1        | -1.3        | 8.08E-03        | PC4 and SFRS1 interacting protein 1                                      | Nucleus                    | other            |
| P52943        | CRIP2        | -1.3        | 5.64E-03        | cysteine-rich protein 2                                                  | Plasma Membrane            | other            |



|        |        |      |          |                                                               |                 |                         |
|--------|--------|------|----------|---------------------------------------------------------------|-----------------|-------------------------|
| Q92890 | UFD1L  | -1.3 | 6.10E-04 | ubiquitin fusion degradation 1 like (yeast)                   | Cytoplasm       | peptidase               |
| P52824 | DGKQ   | -1.3 | 4.30E-02 | diacylglycerol kinase, theta 110kDa                           | Cytoplasm       | kinase                  |
| Q9UJY8 | CHAF1A | -1.3 | 1.96E-02 | chromatin assembly factor 1, subunit A (p150)                 | Nucleus         | other                   |
| Q9Y3F4 | STRAP  | -1.3 | 5.17E-03 | serine/threonine kinase receptor associated protein           | Plasma Membrane | other                   |
| P58546 | MTPN   | -1.3 | 1.89E-03 | myotrophin                                                    | Nucleus         | transcription regulator |
| Q13501 | SQSTM1 | -1.3 | 3.01E-03 | sequestosome 1                                                | Cytoplasm       | transcription regulator |
| Q9UKE5 | TNIK   | -1.3 | 1.51E-03 | TRAF2 and NCK interacting kinase                              | Cytoplasm       | kinase                  |
| P42679 | MATK   | -1.3 | 9.40E-04 | megakaryocyte-associated tyrosine kinase                      | Cytoplasm       | kinase                  |
| Q99996 | AKAP9  | -1.3 | 2.61E-02 | A kinase (PRKA) anchor protein (yotiao) 9                     | Cytoplasm       | other                   |
| Q96NG9 | STXBP5 | -1.3 | 5.01E-03 | syntaxin binding protein 5 (tomosyn)                          | Plasma Membrane | other                   |
| Q14974 | KPNB1  | -1.3 | 4.80E-04 | karyopherin (importin) beta 1                                 | Nucleus         | transporter             |
| O60610 | DIAPH1 | -1.3 | 4.50E-04 | diaphanous homolog 1 (Drosophila)                             | Cytoplasm       | other                   |
| Q01826 | SATB1  | -1.3 | 4.80E-04 | SATB homeobox 1                                               | Nucleus         | transcription regulator |
| P19634 | SLC9A1 | -1.3 | 2.78E-02 | solute carrier family 9 (sodium/hydrogen exchanger), member 1 | Plasma Membrane | ion channel             |
| Q14848 | TRAF4  | -1.3 | 1.34E-02 | TNF receptor-associated factor 4                              | Cytoplasm       | other                   |
| P35659 | DEK    | -1.3 | 8.20E-04 | DEK oncogene                                                  | Nucleus         | transcription regulator |
| Q01094 | E2F1   | -1.3 | 6.36E-03 | E2F transcription factor 1                                    | Nucleus         | transcription regulator |
| P31689 | DNAJA1 | -1.3 | 8.04E-03 | DnaJ (Hsp40) homolog, subfamily A, member 1                   | Nucleus         | other                   |
| Q13476 | KSR1   | -1.3 | 1.85E-03 | kinase suppressor of ras 1                                    | Cytoplasm       | kinase                  |
| Q9NR09 | BIRC6  | -1.3 | 3.62E-03 | baculoviral IAP repeat containing 6                           | Cytoplasm       | enzyme                  |

|               |               |             |                 |                                                                                                        |                        |                               |
|---------------|---------------|-------------|-----------------|--------------------------------------------------------------------------------------------------------|------------------------|-------------------------------|
| P35354        | PTGS2         | -1.3        | 7.60E-04        | prostaglandin-endoperoxide synthase 2 (prostaglandin G/H synthase and cyclooxygenase)                  | Cytoplasm              | enzyme                        |
| P14923        | JUP           | -1.3        | 1.38E-03        | junction plakoglobin                                                                                   | Plasma Membrane        | other                         |
| Q92844        | TANK          | -1.3        | 3.58E-03        | TRAF family member-associated NFKB activator                                                           | Cytoplasm              | other                         |
| P13010        | XRCC5         | -1.3        | 2.97E-02        | X-ray repair complementing defective repair in Chinese hamster cells 5 (double-strand-break rejoining) | Nucleus                | enzyme                        |
| O00165        | HAX1          | -1.3        | 3.74E-03        | HCLS1 associated protein X-1                                                                           | Nucleus                | other                         |
| Q13691        | ABL1          | -1.4        | 8.00E-04        | c-abl oncogene 1, non-receptor tyrosine kinase                                                         | Nucleus                | kinase                        |
| Q9HBY1        | AFAP1         | -1.4        | 8.60E-04        | actin filament associated protein 1                                                                    | Cytoplasm              | other                         |
| Q14790        | CASP8         | -1.4        | 1.29E-02        | caspase 8, apoptosis-related cysteine peptidase                                                        | Nucleus                | peptidase                     |
| P17947        | SPI1          | -1.4        | 2.60E-04        | spleen focus forming virus (SFFV) proviral integration oncogene spi1                                   | Nucleus                | transcription regulator       |
| P15311        | EZR           | -1.4        | 1.28E-03        | ezrin                                                                                                  | Plasma Membrane        | other                         |
| <b>Q92961</b> | <b>MAP2K5</b> | <b>-1.4</b> | <b>5.00E-05</b> | <b>mitogen-activated protein kinase kinase 5</b>                                                       | <b>Cytoplasm</b>       | <b>kinase</b>                 |
| P52630        | STAT2         | -1.4        | 1.82E-02        | signal transducer and activator of transcription 2, 113kDa                                             | Nucleus                | transcription regulator       |
| <b>P20963</b> | <b>CD247</b>  | <b>-1.4</b> | <b>1.30E-04</b> | <b>CD247 molecule</b>                                                                                  | <b>Plasma Membrane</b> | <b>transmembrane receptor</b> |
| P08047        | SP1           | -1.4        | 6.80E-04        | Sp1 transcription factor                                                                               | Nucleus                | transcription regulator       |
| P23443        | RPS6KB1       | -1.4        | 1.00E-03        | ribosomal protein S6 kinase, 70kDa, polypeptide 1                                                      | Cytoplasm              | kinase                        |
| P13500        | CCL2          | -1.4        | 3.10E-04        | chemokine (C-C motif) ligand 2                                                                         | Extracellular Space    | cytokine                      |
| Q01484        | ANK2          | -1.4        | 3.35E-03        | ankyrin 2, neuronal                                                                                    | Plasma Membrane        | other                         |

|        |          |      |                 |                                                             |                 |                            |
|--------|----------|------|-----------------|-------------------------------------------------------------|-----------------|----------------------------|
| Q92558 | WASF1    | -1.4 | <b>1.70E-04</b> | WAS protein family, member 1                                | Nucleus         | other                      |
| P33992 | MCM5     | -1.4 | <b>7.00E-05</b> | minichromosome maintenance complex component 5              | Nucleus         | enzyme                     |
| Q9Y3R0 | GRIP1    | -1.5 | 4.20E-04        | glutamate receptor interacting protein 1                    | Plasma Membrane | other                      |
| P51956 | NEK3     | -1.5 | 2.67E-02        | NIMA (never in mitosis gene a)-related kinase 3             | Nucleus         | kinase                     |
| P08133 | ANXA6    | -1.5 | 7.78E-03        | annexin A6                                                  | Plasma Membrane | other                      |
| Q05086 | UBE3A    | -1.5 | 4.30E-04        | ubiquitin protein ligase E3A                                | Nucleus         | enzyme                     |
| Q9UQF2 | MAPK8IP1 | -1.6 | 2.20E-04        | mitogen-activated protein kinase 8 interacting protein 1    | Cytoplasm       | other                      |
| O75899 | GABBR2   | -1.6 | 1.46E-03        | gamma-aminobutyric acid (GABA) B receptor, 2                | Plasma Membrane | G-protein coupled receptor |
| Q9Y478 | PRKAB1   | -1.6 | 1.13E-03        | protein kinase, AMP-activated, beta 1 non-catalytic subunit | Nucleus         | kinase                     |

<sup>1</sup>To identify proteins interacting with TNFAIP8, PC-3 cells were treated with TNFAIP8 siRNA (Si2 SiRNA/SiRNA) or a scrambled siRNA (ScrSiRNA/MM). TNFAIP8 was immunoprecipitated using anti-TNFAIP8 antibody, and the immune-complexes were analyzed for TNFAIP8 binding proteins using antibody microarrays as explained in Materials and Methods. Fold change represents the ratio of largest of MM. Si, divided by smallest. The minus sign in front of the fold depicts expression level in MM relative to MM median is less than level in SiRNA relative to SiRNA median. <sup>2</sup>P-value is the significance of the difference between the two spots for MM and the two spots for SiRNA. P-values of less than 2e-4 are bolded as they were found to be statistically significant even under the very stringent Bonferroni criterion to adjust for multiple testing.
